# Supplementary material for: Four- and three-coordinate planar iron(ii) complexes supported by bulky organosilyl ligands
Source: Royal Society of Chemistry journal article supplement (doi:10.1039/d3dt02219f), 2023-01-01
Supplement: d3dt02219f1.pdf [file d3dt02219f1.pdf]

Supporting information for

Four- and Three-coordinate Planar Iron(II) Complexes Supported by Bulky Organosilyl Ligands

*Reon Ishii,<sup>a</sup> Minesato Nakagawa,<sup>a</sup> Yoshimasa Wada<sup>a,b</sup> and Yusuke Sunada<sup>\*a,b,c</sup>*

<sup>a</sup>Department of Applied Chemistry, School of Engineering Science, and <sup>b</sup>Institute of Industrial

Science, The University of Tokyo, 4-6-1 Komaba, Meguro-ku, Tokyo 153-8505, Japan.

<sup>c</sup>JST PRESTO, 4-1-8 Honcho, Kawaguchi, Saitama, 332-0012 Japan

**Contents**

|                               |         |
|-------------------------------|---------|
| 1. General                    | p. S-2  |
| 2. Experimental details       | p. S-2  |
| 3. Theoretical calculations   | p. S-10 |
| 4. X-ray diffraction analysis | p. S-23 |
| 5. References                 | p. S-52 |

**General.** Manipulation of air and moisture sensitive compounds was carried out under a dry nitrogen atmosphere using Schlenk tube techniques associated with a high-vacuum line or in the glove box which was filled with dry nitrogen. All solvents were purchased from Kanto Chemical Co. Inc., and was dried over activated molecular sieves 4Å prior to use. <sup>1</sup>H NMR spectrum was recorded using a JEOL Lambda 400 spectrometer and ECZ 600 spectrometer at ambient temperature. <sup>1</sup>H NMR chemical shifts (δ values) were given in ppm relative to the solvent signal. Elemental analyses (C, H, N) were carried out on externally at A Rabbit Science Co., Ltd. Starting materials, Fe[Si(SiMe<sub>3</sub>)<sub>3</sub>]<sub>2</sub>(THF)<sub>2</sub><sup>1</sup>, 1,1,4,4-tetrakis(trimethylsilyl)octamethylcyclohexasilane<sup>2</sup>, MeIM<sup>Me</sup><sup>3</sup>, MeCAAC<sup>4</sup> were synthesized by the method reported in the literature. Other reagents were purchased from Tokyo Chemical Industries Co., Ltd. or FUJIFILM Wako Pure Chemical Co., Inc. or Kanto Chemical Co., Inc. or Sigma Aldrich, and were used without further purification.

**Synthesis of *trans*-Fe[Si(SiMe<sub>3</sub>)<sub>3</sub>]<sub>2</sub>(MeIM<sup>Me</sup>)<sub>2</sub> (2).** In a 50 mL Schlenk tube, Fe[Si(SiMe<sub>3</sub>)<sub>3</sub>]<sub>2</sub>(THF)<sub>2</sub> (1) (347 mg, 0.500 mmol) was dissolved in toluene (2 mL), then MeIM<sup>Me</sup> (126 mg, 1.01 mmol) in toluene (2 mL) was added to this solution. The solution was stirred at room temperature for 30 min. The color of the solution turned from dark green to dark brown. The reaction solution was evaporated *in vacuo*, and the obtained solid was dissolved in diethyl ether (10 mL), then the solution was centrifuged to remove the insoluble materials. The solvent was concentrated to ca. 2 mL, and the remaining solution was cooled at -30 °C, from which complex **2** was obtained as red crystals in 66% yield (263 mg). <sup>1</sup>H NMR (400 MHz, r.t., C<sub>6</sub>D<sub>6</sub>): δ = -46.24 (brs, 12H, CH<sub>3</sub>), 5.00 (s, 54H, CH<sub>3</sub>), 16.10 (s, 12H, CH<sub>3</sub>). Magnetic susceptibility (Evans): μ<sub>eff</sub> = 3.75 (C<sub>6</sub>D<sub>6</sub>, 20 °C). Anal calcd for C<sub>32</sub>H<sub>78</sub>N<sub>4</sub>Si<sub>8</sub>Fe; C 48.07, H 9.83, N 7.01; found: C 48.07, H 9.82, N 7.15.

**Synthesis of *cis*-Fe[Si<sub>8</sub>Me<sub>14</sub>](MeIM<sup>Me</sup>)<sub>2</sub> (3).** In a 50 mL Schlenk tube, 1,1,4,4-tetrakis(trimethylsilyl)octamethylcyclohexasilane (291 mg, 0.501 mmol) was dissolved in DME (4 mL), then KO<sup>t</sup>Bu (114 mg, 1.02 mmol) was added to this solution. The solution was stirred at room temperature for 18 h. During the course of the reaction, the color of the solution turned to yellow. The solution was evaporated *in vacuo*, and the obtained yellow oil was dissolved in toluene (4 mL). In a 20 mL vial, FeBr<sub>2</sub> (108 mg, 0.502 mmol) was suspended in toluene (2 mL), then TMEDA (75 μL, 0.500 mmol) was added to this suspension. The suspension was stirred at room temperature for 30 min. To this suspension was added yellow solution of the potassium salt of silyl dianion prepared above. The reaction mixture was stirred at room temperature for 30 min. The pale-yellow suspension turned to dark brown solution, then the solution was centrifuged to remove the insoluble materials. To the solution was added MeIM<sup>Me</sup> (125 mg, 1.01 mmol) in toluene (2 mL), and stirred at room temperature for 30 min. The dark brown solution turned to dark red, then the solution was evaporated *in vacuo*, and the obtained solid was dissolved in diethyl ether (5 mL), then the solution was centrifuged to remove the insoluble materials. The solvent was concentrated to ca. 2 mL, and the remaining solution was cooled at -30 °C, from which complex **3** was obtained as red crystals in 52% yield (193 mg). <sup>1</sup>H NMR (400 MHz, r.t., C<sub>6</sub>D<sub>6</sub>): δ = -78.37 (brs, 12H, CH<sub>3</sub>), -31.32 (s, 12H, CH<sub>3</sub>), -1.40 (s, 18H, CH<sub>3</sub>), 11.98 (s, 12H, CH<sub>3</sub>), 15.87 (s, 12H, CH<sub>3</sub>). Magnetic susceptibility (Evans): μ<sub>eff</sub> = 4.13 (C<sub>6</sub>D<sub>6</sub>, 21 °C). Anal calcd for C<sub>28</sub>H<sub>66</sub>N<sub>4</sub>Si<sub>8</sub>Fe;

C 45.48, H 9.00, N 7.58; found: C 45.46, H 7.98, N 7.66. Even though a number of attempts have been made, we have been unable to obtain satisfactory elemental analysis values for **3**, presumably due to the high instability toward both air and moisture.

**Synthesis of Fe[Si<sub>8</sub>Me<sub>14</sub>](<sup>Me</sup>CAAC) (**4**).** In a 50 mL Schlenk tube, 1,1,4,4-tetrakis(trimethylsilyl)octamethylcyclohexasilane (292 mg, 0.502 mmol) was dissolved in DME (4 mL), then KO<sup>t</sup>Bu (114 mg, 1.02 mmol) was added to this solution. The solution was stirred at room temperature for 18 h. In the course of this reaction, the color of the solution turned to yellow. The solution was evaporated *in vacuo*, and the obtained yellow oil was dissolved in toluene (4 mL). In a 20 mL vial, FeBr<sub>2</sub> (108 mg, 0.502 mmol) was suspended in toluene (2 mL), then TMEDA (75  $\mu$ L, 0.500 mmol) was added to this suspension. The suspension was stirred at room temperature for 30 min. To this suspension was added yellow solution of the potassium salt of silyl dianion prepared above. The reaction mixture was stirred at room temperature for 30 min. The pale-yellow suspension turned to dark brown solution, then the solution was centrifuged to remove the insoluble materials. The mother liquid was evaporated *in vacuo*, and the obtained solid was dissolved in pyridine (2 mL). The solution stirred for 15 min at room temperature, then solvent was removed *in vacuo*. The reaction mixture was dissolved in diethyl ether (4 mL), then solution of <sup>Me</sup>CAAC (143 mg, 0.501 mmol) in diethyl ether (2 mL) was added to this solution. The solution was stirred at room temperature for 10 min. The color of the solution turned from green-brown to dark red-purple. The mother liquid was evaporated *in vacuo*, and the obtained solid was dissolved in diethyl ether (4 mL). The solvent was concentrated to ca. 2 mL, and the remaining solution was cooled at -30 °C, from which complex **4** was obtained as dark purple crystals in 21% yield (82 mg). <sup>1</sup>H NMR (400 MHz, r.t., C<sub>6</sub>D<sub>6</sub>):  $\delta$  = -40.07 (brs, 12H, CH<sub>3</sub>), 0.29-2.11 (m, 12H, CH<sub>3</sub>), 3.27 (brs, 2H, CH<sub>2</sub>), 4.58 (brs, 2H, CH<sub>2</sub>), 5.08 (brs, 6H, CH<sub>3</sub>), 11.57 (brs, 1H, Ar-H), 12.71 (brs, 6H, CH<sub>3</sub>), 17.43 (brs, 2H, Ar-H), 30.99 (brs, 12H, CH<sub>3</sub>), 50.63 (brs, 18H, CH<sub>3</sub>). Magnetic susceptibility (Evans):  $\mu_{\text{eff}} = 5.83$  (C<sub>6</sub>D<sub>6</sub>, 20 °C). Anal calcd for C<sub>34</sub>H<sub>73</sub>N<sub>1</sub>Si<sub>8</sub>Fe; C 52.59, H 9.48, N 1.80; found: C 52.57, H 9.52, N 1.95.

**General Procedure for the hydrosilylation of acetophenone with Ph<sub>2</sub>SiH<sub>2</sub> catalyzed by iron(II) complexes.**

Acetophenone (360  $\mu$ L, 3.0 mmol) and Ph<sub>2</sub>SiH<sub>2</sub> (1.21 mL, 6.6 mmol) were placed in a 4 mL vial, then an iron(II) complexes **2**, **3** or **4** (0.003 mmol, 0.1 mol%) was added to this mixture. The resulting mixture was stirred at r.t. for 1 h, then conversion of acetophenone was estimated by <sup>1</sup>H NMR spectrum.

**General Procedure for the hydrosilylation of acetophenone with TMDS catalyzed by iron(II) complexes.**

Acetophenone (120  $\mu$ L, 1.0 mmol) and 1,1,3,3-tetramethyldisiloxane (TMDS) (390  $\mu$ L, 2.2 mmol) were placed in a 4 mL vial, then an iron(II) complexes **1**, **2**, **3** or **4** (0.005 mmol, 0.5 mol%) was added. The resulting mixture was stirred at r.t. for 24 h, then conversion was estimated by <sup>1</sup>H NMR spectrum.

**Isolation of the silyl ether.** In the hydrosilylation of acetophenone with Ph<sub>2</sub>SiH<sub>2</sub>, the silyl ether was isolated

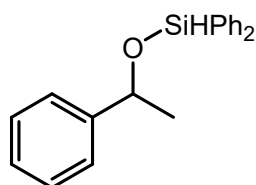

according to the following procedure. In a 20 mL vial, acetophenone (1.80 g, 15 mmol) and Ph<sub>2</sub>SiH<sub>2</sub> (6.10 g, 33 mmol) were placed in a 20 mL vial, then an iron(II) complex **2** (6.1 mg, 0.0076 mmol, 0.05 mol%) was added to this mixture. The resulting mixture

was stirred at r.t. for 1 h. After the reaction, the reaction mixture was distilled under reduced pressure (170 °C, 3 Pa) to obtain the product as colorless oil. Isolated yield: 4.10 g (89 %). <sup>1</sup>H NMR (600 MHz, r.t., CDCl<sub>3</sub>): δ = 1.51 (d, 3H, CH<sub>3</sub>), 5.00 (q, 1H, CH), 5.41 (s, 1H, SiH), 7.24-7.64 (m, 15H, Ar-H). <sup>13</sup>C NMR (150MHz, r.t., CDCl<sub>3</sub>): δ = 26.4 (CH<sub>3</sub>), 72.8 (CH), 125.7 (C<sub>6</sub>H<sub>5</sub>), 127.3 (C<sub>6</sub>H<sub>5</sub>), 128.1 (C<sub>6</sub>H<sub>5</sub>), 128.4 (C<sub>6</sub>H<sub>5</sub>), 130.4 (C<sub>6</sub>H<sub>5</sub>), 134.1 (C<sub>6</sub>H<sub>5</sub>), 134.4 (C<sub>6</sub>H<sub>5</sub>), 134.8 (C<sub>6</sub>H<sub>5</sub>), 145.4 (C<sub>6</sub>H<sub>5</sub>). <sup>29</sup>Si NMR (119 MHz, r.t., CDCl<sub>3</sub>): δ = -12.42. The actual NMR charts were shown in **Figures S4-S6**.

**Figure S1.**  $^1\text{H}$  NMR spectrum of solution of **2** in  $\text{C}_6\text{D}_6$  at room temperature.

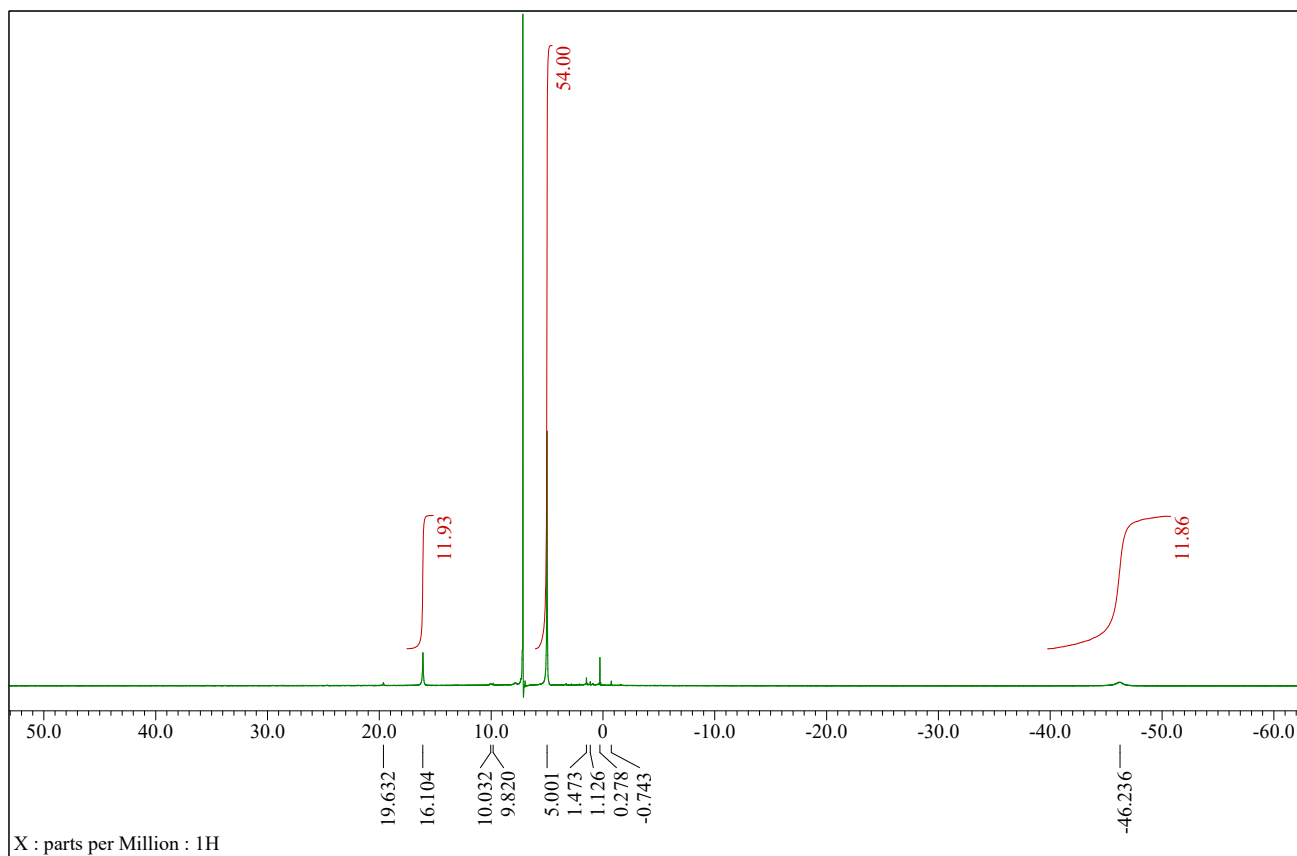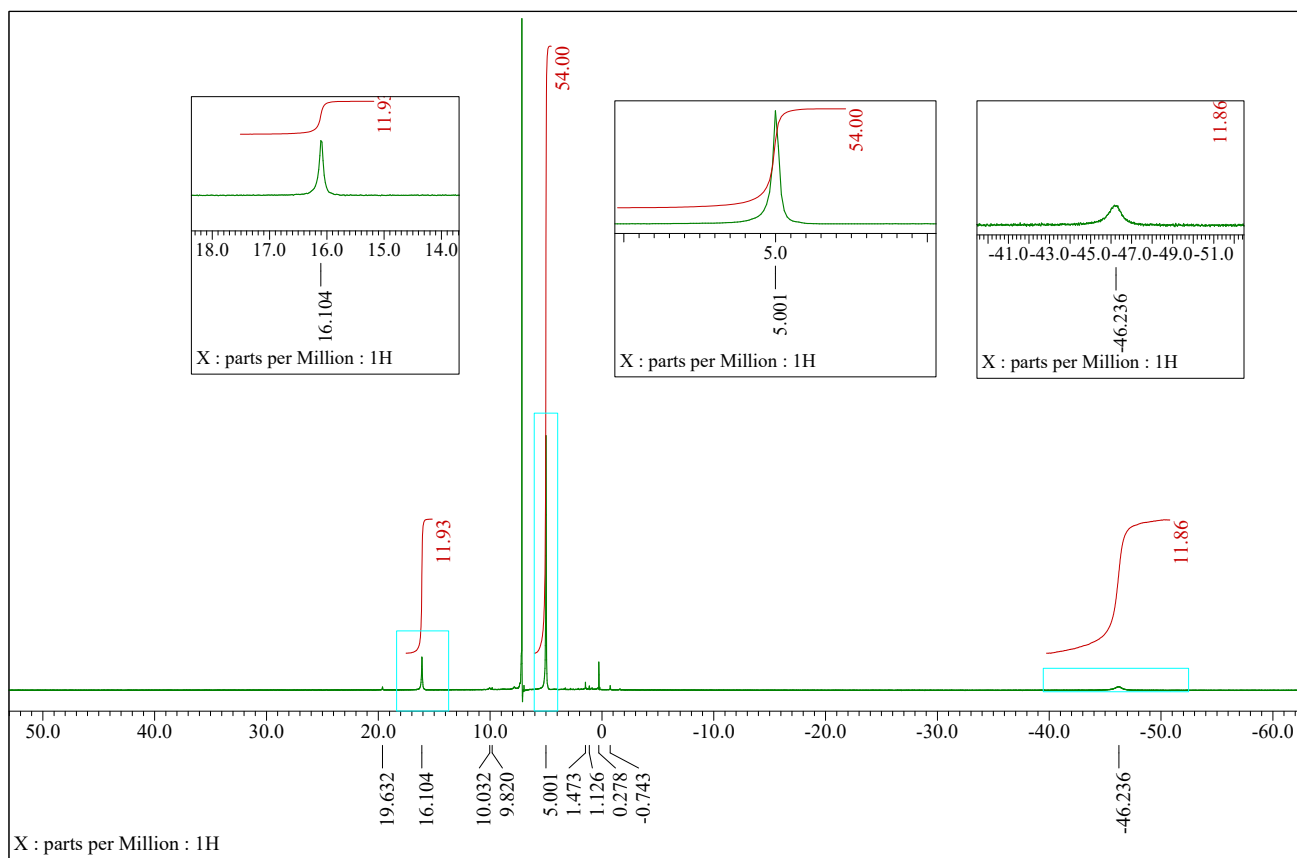

**Figure S2.**  $^1\text{H}$  NMR spectrum of solution of **3** in  $\text{C}_6\text{D}_6$  at room temperature.

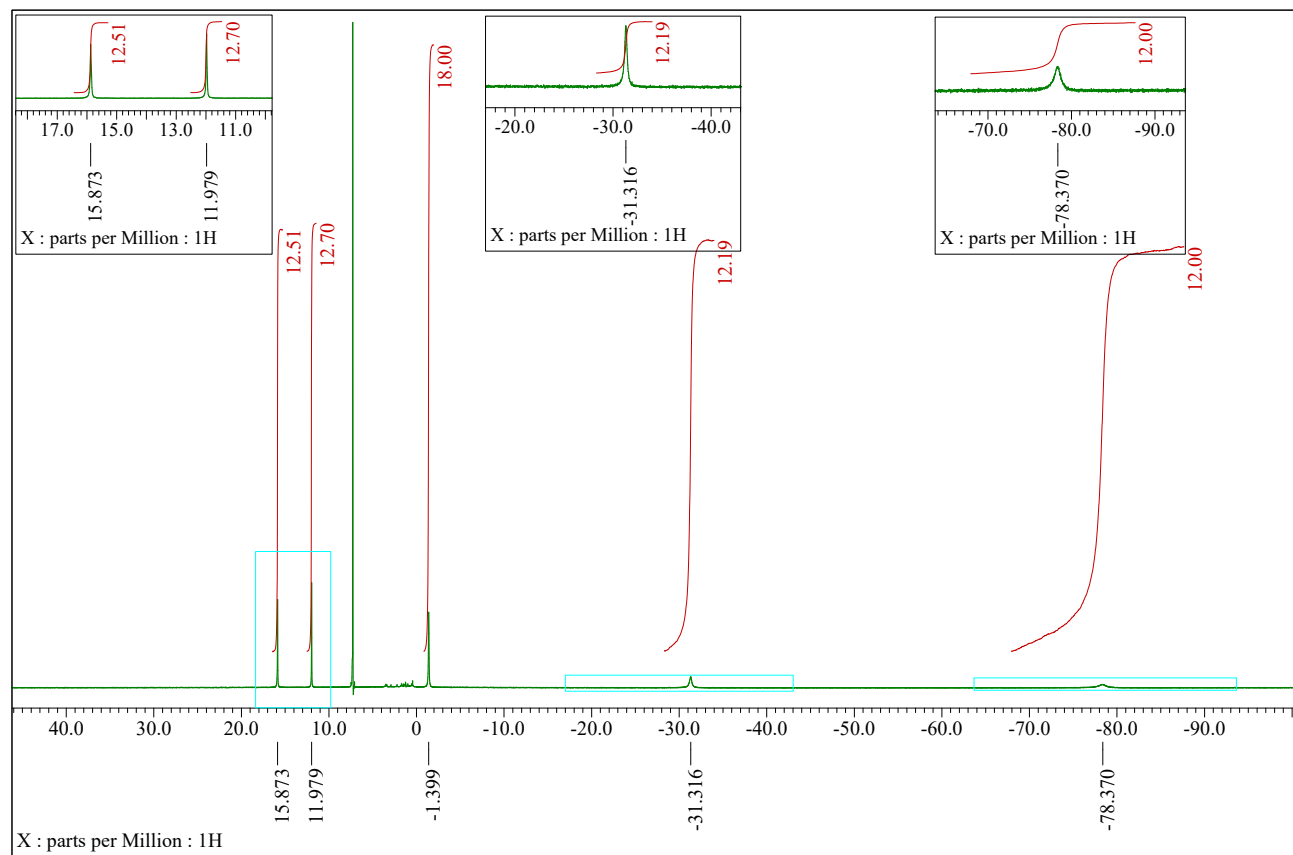

**Figure S3.**  $^1\text{H}$  NMR spectrum of solution of **4** in  $\text{C}_6\text{D}_6$  at room temperature.

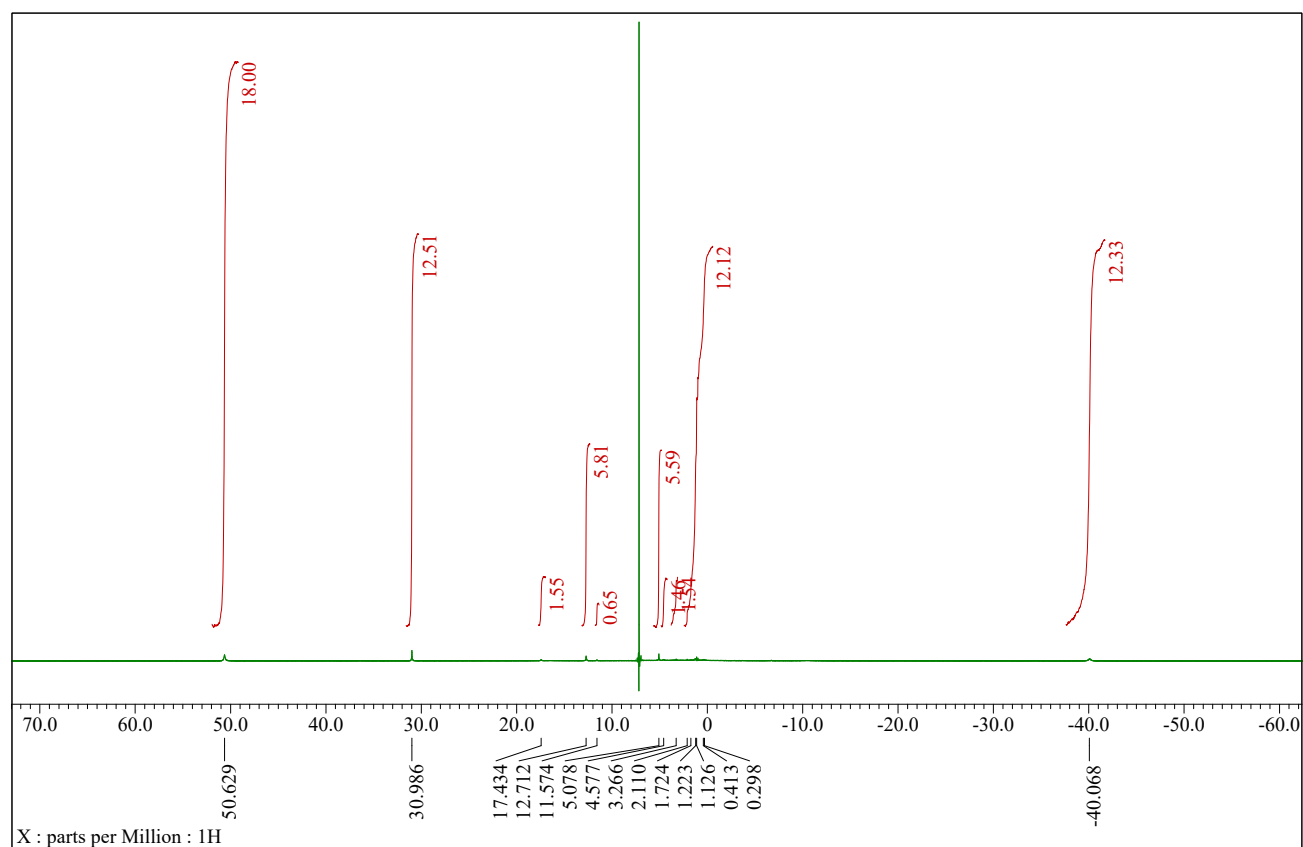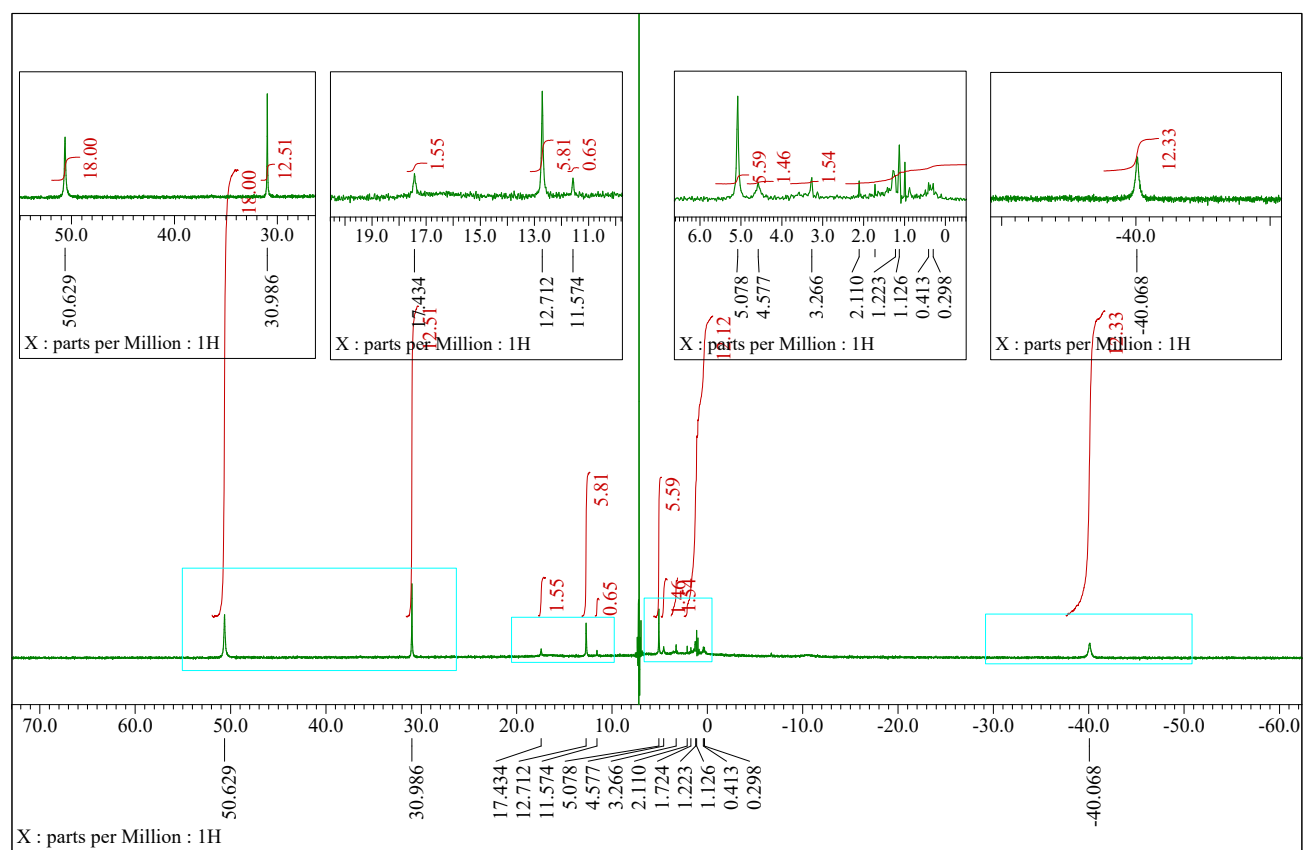

**Figure S4.**  $^1\text{H}$  NMR spectrum of solution of silyl ether in  $\text{CDCl}_3$  at room temperature.

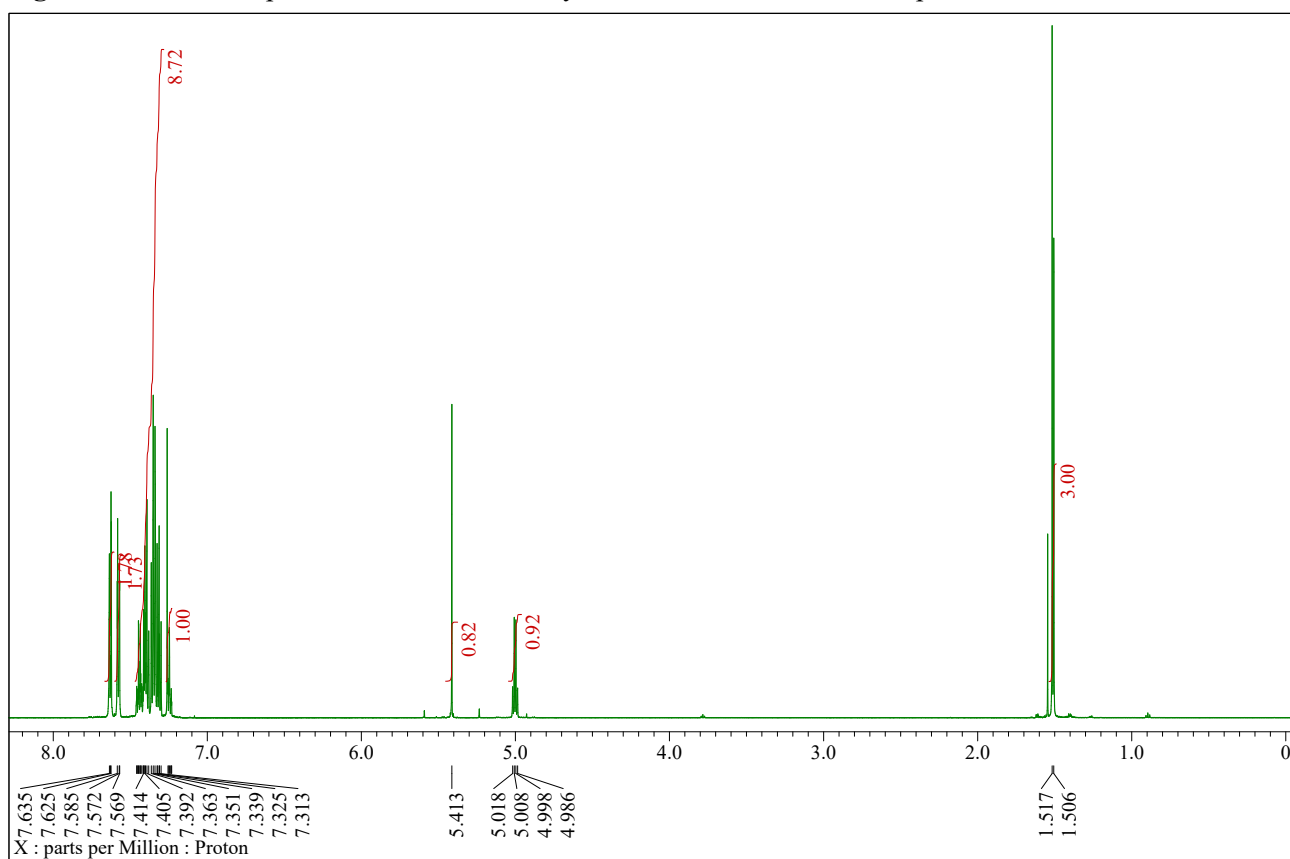

**Figure S5.**  $^{13}\text{C}$  NMR spectrum of solution of silyl ether in  $\text{CDCl}_3$  at room temperature.

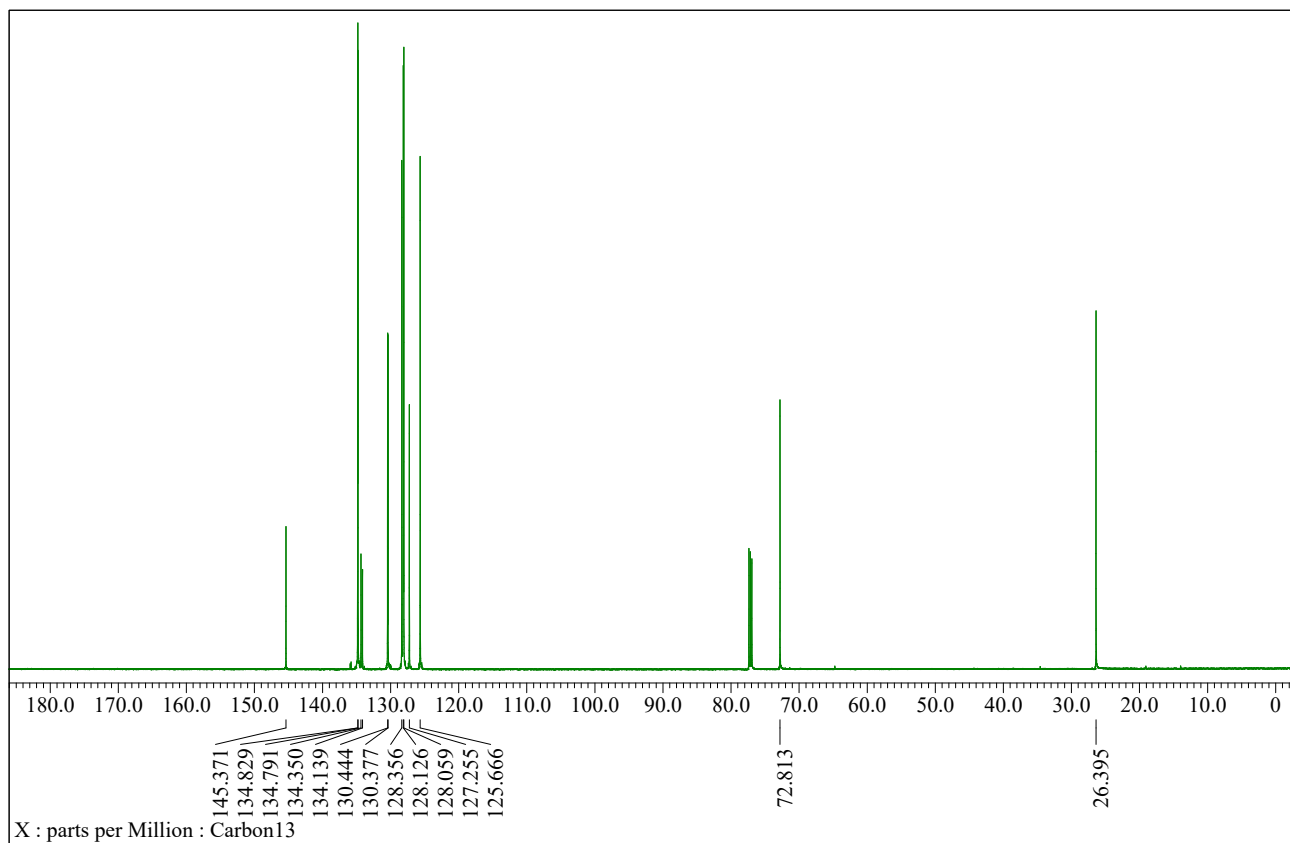



**Figure S6.**  $^{29}\text{Si}$  NMR spectrum of solution of silyl ether in  $\text{CDCl}_3$  at room temperature.

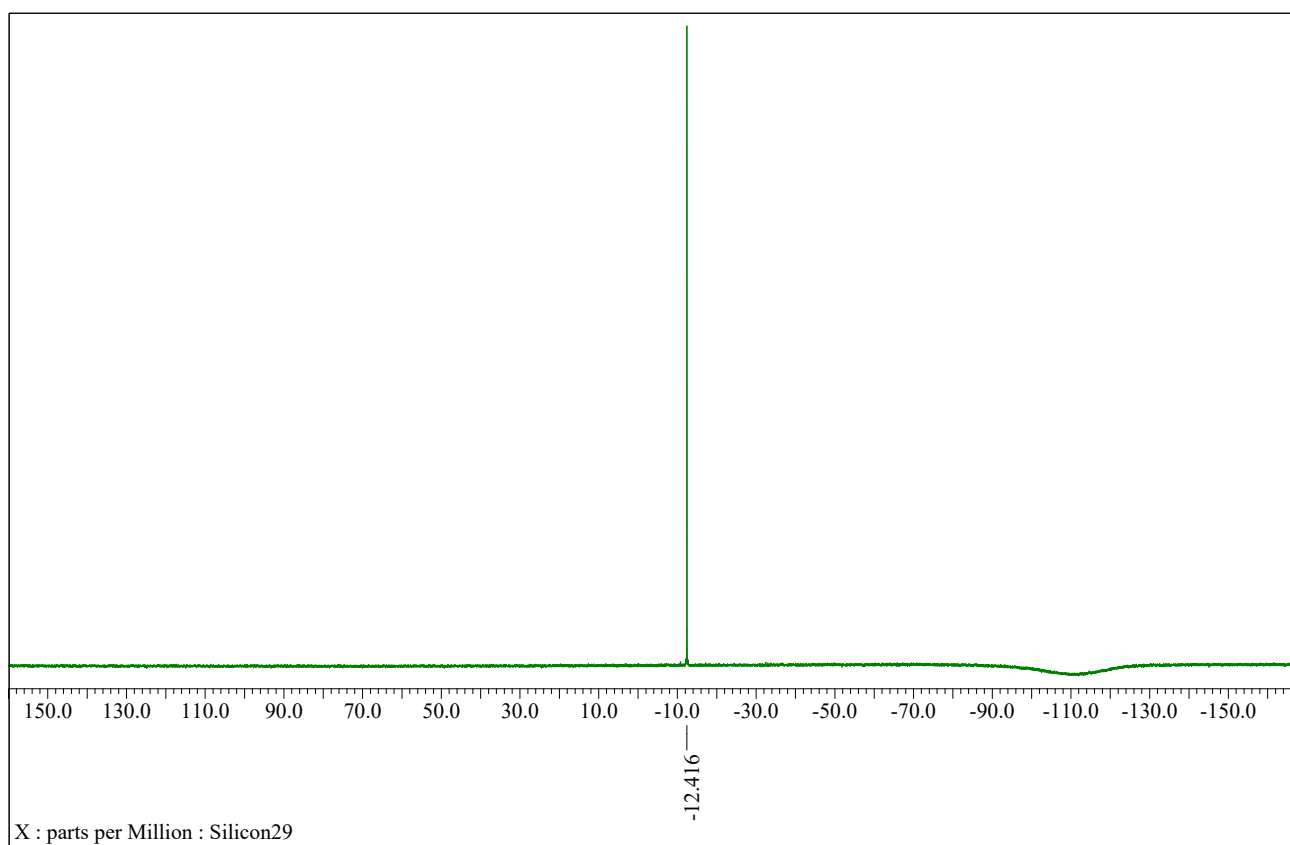

### General procedure of theoretical calculation

All density functional theory (DFT) calculations were performed using Gaussian 16, Revision C.01. Tight convergence criterion was used for SCF cycles throughout the calculations (SCF = tight). B3PW91 functional was used with the 6-31G\*\* basis set for H, C, N, and Si, and with the SDD basis set, which uses the Stuttgart-Dresden effective core potentials, for Fe. Unless otherwise specified, the default settings were used throughout the study. Geometry optimization for  $(\text{MeIM}^{\text{Me}})_2\text{Fe}[\text{Si}(\text{SiMe}_3)_2]_2$  was performed using a single crystal XRD-determined solid-state structure as a starting geometry. For  $S = 1$  spin configuration,  $(\text{MeIM}^{\text{Me}})_2\text{Fe}[\text{Si}(\text{SiMe}_3)_2]_2$  resulted in a square planar geometry ( $\mathbf{2}_{\text{s-opt}}$ ). For the calculation of  $S = 2$  spin configuration, initial structure was manually modified into quasi-tetrahedral structure, which was used for geometry optimization and resulted in a tetrahedral geometry ( $\mathbf{2}_{\text{t-opt}}$ ). These theoretical structural data were summarized in Figures S7 and Table S1 for  $\mathbf{2}_{\text{s-opt}}$  and Figure S8 and Table S3 for  $\mathbf{2}_{\text{t-opt}}$ . For these optimized structures ( $\mathbf{2}_{\text{s-opt}}$  and  $\mathbf{2}_{\text{t-opt}}$ ), frequency analyses were also performed, and no-imaginary frequency was observed, confirming the local minima of these geometries. While the sum of electronic and thermal enthalpies of  $\mathbf{2}_{\text{s-opt}} = -3923.556384$  Hartree, that of  $\mathbf{2}_{\text{t-opt}} = -3923.565107$  Hartree, which is 0.008723 Hartree ( $\approx 5.47$  kcal mol $^{-1}$ ) lower in energy.

**Figure S7.** Optimized geometry of  $\mathbf{2}_{\text{s-opt}}$ . All hydrogen atoms are omitted for clarity.

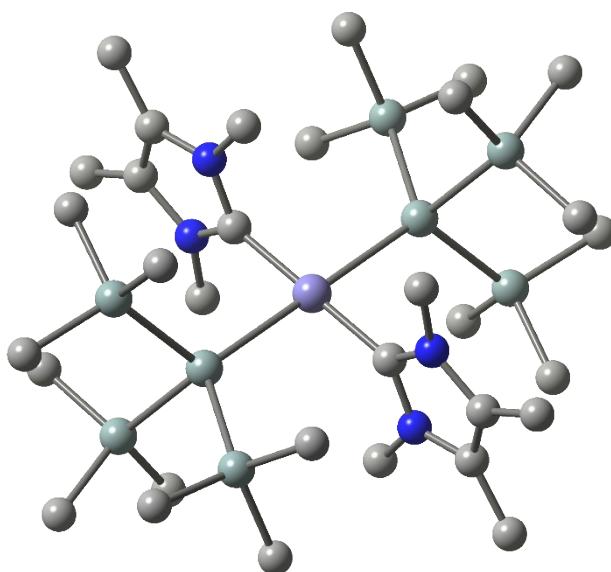

**Table S1.** Cartesian coordinates of optimized structures of  $\mathbf{2}_{\text{s-opt}}$ .

|    |             |             |             |
|----|-------------|-------------|-------------|
| Fe | -0.00000600 | 0.00001600  | -0.00011800 |
| Si | 2.62786100  | 0.04044700  | -0.04229000 |
| Si | 3.80040700  | -1.22648600 | -1.71336500 |
| Si | 3.82827100  | 2.12456600  | -0.19471300 |
| Si | 3.63182600  | -0.86237400 | 1.94049800  |

|   |             |             |             |
|---|-------------|-------------|-------------|
| N | -0.09920900 | 2.84933900  | -1.08564600 |
| N | 0.02411600  | 2.77668400  | 1.04963400  |
| C | 3.68145200  | -0.35255700 | -3.40483200 |
| H | 4.17986800  | 0.62222400  | -3.38825700 |
| H | 4.15967800  | -0.95648500 | -4.18567400 |
| H | 2.64071300  | -0.18424700 | -3.70421700 |
| C | 3.18610400  | -3.01062300 | -1.99997600 |
| H | 2.98812100  | -3.54114900 | -1.06424900 |
| H | 2.28007200  | -3.04564000 | -2.60861100 |
| H | 3.96408100  | -3.56286300 | -2.54156600 |
| C | 5.65785100  | -1.49569200 | -1.37744200 |
| H | 5.80991200  | -2.16904500 | -0.52745500 |
| H | 6.10540300  | -1.97655000 | -2.25684200 |
| H | 6.21138600  | -0.57629000 | -1.18071100 |
| C | 3.25643600  | 3.28739000  | -1.59275500 |
| H | 3.17785400  | 2.77050400  | -2.55445300 |
| H | 2.29199800  | 3.74388500  | -1.35968800 |
| H | 3.98834100  | 4.09610200  | -1.70924600 |
| C | 3.68896000  | 3.15616500  | 1.40460100  |
| H | 4.04762400  | 2.61233200  | 2.28433300  |
| H | 4.29257300  | 4.06735800  | 1.31046500  |
| H | 2.65605600  | 3.46263100  | 1.59278500  |
| C | 5.70111900  | 1.98161100  | -0.52717300 |
| H | 6.22822300  | 1.34020900  | 0.18231100  |
| H | 5.90285600  | 1.61152800  | -1.53737700 |
| H | 6.13669800  | 2.98673700  | -0.45687400 |
| C | 2.79577700  | -0.27997000 | 3.55718400  |
| H | 2.99514600  | 0.78471700  | 3.72355900  |
| H | 1.71236200  | -0.42105700 | 3.57481800  |
| H | 3.21904100  | -0.82291000 | 4.41163200  |
| C | 5.45856400  | -0.40355700 | 2.23208700  |
| H | 6.10476500  | -0.71721400 | 1.40799400  |
| H | 5.59734300  | 0.67164800  | 2.38031300  |
| H | 5.80840100  | -0.90886600 | 3.14155100  |
| C | 3.62906700  | -2.77122300 | 1.92036500  |
| H | 4.41689300  | -3.13507900 | 1.25202200  |
| H | 3.83794500  | -3.17268300 | 2.91989600  |
| H | 2.68687500  | -3.19442800 | 1.56314700  |

|    |             |             |             |
|----|-------------|-------------|-------------|
| C  | -0.01189800 | 1.97295200  | -0.04842800 |
| C  | -0.05513100 | 2.45793300  | -2.47728700 |
| H  | -1.00729900 | 2.65026700  | -2.97744600 |
| H  | 0.74316800  | 2.99369700  | -2.99712400 |
| H  | 0.16427400  | 1.39031900  | -2.51388000 |
| C  | -0.13473900 | 4.17376800  | -0.64565500 |
| C  | -0.24663500 | 5.32588300  | -1.58131700 |
| H  | -1.15323200 | 5.26448200  | -2.19448800 |
| H  | -0.28913900 | 6.26371300  | -1.02346400 |
| H  | 0.61114000  | 5.38662500  | -2.26177400 |
| C  | -0.05119700 | 4.12735900  | 0.71405100  |
| C  | -0.04052600 | 5.22373700  | 1.71985800  |
| H  | 0.88171500  | 5.22921600  | 2.31261400  |
| H  | -0.11051900 | 6.19149700  | 1.21861400  |
| H  | -0.88743900 | 5.14960000  | 2.41166000  |
| C  | 0.19250700  | 2.22985800  | 2.37947300  |
| H  | 0.11704800  | 3.02293300  | 3.12416800  |
| H  | -0.58812200 | 1.48919900  | 2.57650100  |
| H  | 1.17067300  | 1.74994800  | 2.46544200  |
| Si | -2.62787100 | -0.04046000 | 0.04227600  |
| Si | -3.80039600 | 1.22657100  | 1.71331700  |
| Si | -3.82829800 | -2.12456400 | 0.19488000  |
| Si | -3.63185800 | 0.86228000  | -1.94056400 |
| N  | 0.09907600  | -2.84924400 | 1.08557600  |
| N  | -0.02396800 | -2.77675200 | -1.04972100 |
| C  | -3.68152500 | 0.35258100  | 3.40476500  |
| H  | -4.18011500 | -0.62211200 | 3.38815500  |
| H  | -4.15963300 | 0.95655300  | 4.18564400  |
| H  | -2.64081200 | 0.18406700  | 3.70412300  |
| C  | -3.18604700 | 3.01067700  | 2.00003000  |
| H  | -2.98818100 | 3.54130500  | 1.06433500  |
| H  | -2.27994800 | 3.04564200  | 2.60856800  |
| H  | -3.96397400 | 3.56284600  | 2.54176700  |
| C  | -5.65783100 | 1.49585100  | 1.37741200  |
| H  | -5.80992500 | 2.16910700  | 0.52735500  |
| H  | -6.10531400 | 1.97682600  | 2.25678400  |
| H  | -6.21140400 | 0.57644000  | 1.18083600  |
| C  | -3.25660000 | -3.28731500 | 1.59303500  |

|   |             |             |             |
|---|-------------|-------------|-------------|
| H | -3.17814800 | -2.77039400 | 2.55472600  |
| H | -2.29213400 | -3.74381600 | 1.36011400  |
| H | -3.98852000 | -4.09602600 | 1.70945400  |
| C | -3.68888700 | -3.15631000 | -1.40433300 |
| H | -4.04734600 | -2.61251700 | -2.28417400 |
| H | -4.29261300 | -4.06742900 | -1.31021500 |
| H | -2.65598200 | -3.46290600 | -1.59230800 |
| C | -5.70115700 | -1.98154600 | 0.52727400  |
| H | -6.22820500 | -1.33988900 | -0.18201300 |
| H | -5.90285600 | -1.61174900 | 1.53759400  |
| H | -6.13682700 | -2.98661100 | 0.45667700  |
| C | -2.79578200 | 0.27989600  | -3.55723500 |
| H | -2.99513100 | -0.78479400 | -3.72361700 |
| H | -1.71237100 | 0.42101100  | -3.57484400 |
| H | -3.21904900 | 0.82282700  | -4.41168700 |
| C | -5.45858700 | 0.40342700  | -2.23214100 |
| H | -6.10478800 | 0.71723100  | -1.40810300 |
| H | -5.59737700 | -0.67180200 | -2.38018500 |
| H | -5.80842000 | 0.90858800  | -3.14168900 |
| C | -3.62912000 | 2.77112400  | -1.92042300 |
| H | -4.41697100 | 3.13496300  | -1.25209800 |
| H | -3.83796200 | 3.17261300  | -2.91994900 |
| H | -2.68694100 | 3.19431600  | -1.56315900 |
| C | 0.01192900  | -1.97293400 | 0.04828000  |
| C | 0.05496700  | -2.45771400 | 2.47718200  |
| H | 1.00721100  | -2.64974400 | 2.97731000  |
| H | -0.74315500 | -2.99364800 | 2.99711300  |
| H | -0.16473300 | -1.39015500 | 2.51368300  |
| C | 0.13469000  | -4.17370700 | 0.64569200  |
| C | 0.24657300  | -5.32575100 | 1.58144400  |
| H | 1.15312000  | -5.26425800 | 2.19468100  |
| H | 0.28917100  | -6.26361800 | 1.02366100  |
| H | -0.61124900 | -5.38649600 | 2.26184100  |
| C | 0.05130000  | -4.12740200 | -0.71402800 |
| C | 0.04077200  | -5.22385000 | -1.71975700 |
| H | -0.88138400 | -5.22937400 | -2.31264500 |
| H | 0.11070600  | -6.19157500 | -1.21843600 |
| H | 0.88778100  | -5.14976400 | -2.41144800 |

|   |             |             |             |
|---|-------------|-------------|-------------|
| C | -0.19229200 | -2.23006700 | -2.37962300 |
| H | -0.11570000 | -3.02305200 | -3.12430200 |
| H | 0.58775200  | -1.48868400 | -2.57624100 |
| H | -1.17085900 | -1.75106800 | -2.46609100 |

**Table S2.** Actual and calculated bond distances and angles for **2<sub>s-opt</sub>**.

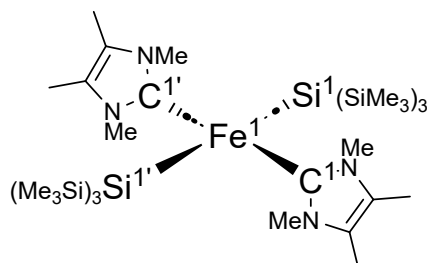

|                   | Actual bond distances / angles | Calculated bond distances / angles |
|-------------------|--------------------------------|------------------------------------|
| Si(1)-Fe(1)       | 2.5385 Å                       | 2.6285 Å                           |
| C(1)-Fe(1)        | 1.956 Å                        | 1.9736 Å                           |
| Si(1)-Fe(1)-C(1)  | 92.65 °                        | 90.56 °                            |
| Si(1)-Fe(1)-C(1') | 87.35 °                        | 89.44 °                            |

**Figure S8.** Optimized geometry of  $2_{t-opt}$ . All hydrogen atoms are omitted for clarity.

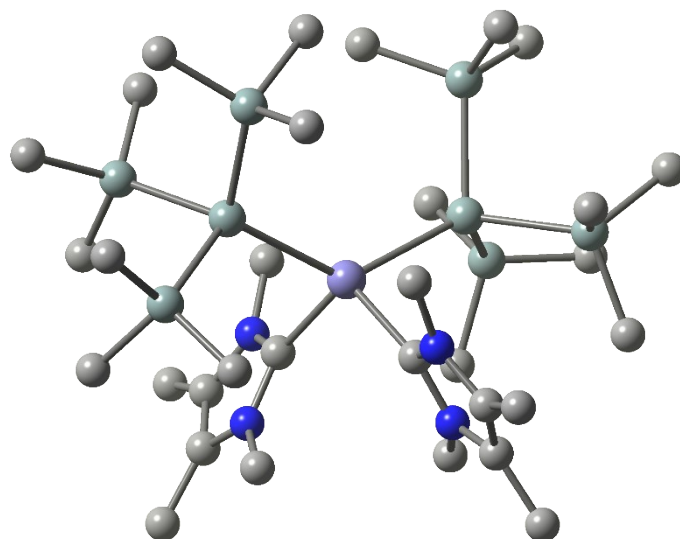

**Table S3.** Cartesian coordinates of optimized structures of  $2_{t-opt}$ .

|    |             |             |             |
|----|-------------|-------------|-------------|
| Fe | -0.00442800 | -0.04675400 | -0.28417700 |
| Si | 2.46251200  | 0.33785300  | 0.79858600  |
| Si | 3.95580300  | -1.52291700 | 0.66932600  |
| Si | 3.80417200  | 2.09777700  | -0.12349100 |
| Si | 2.58194200  | 0.81499600  | 3.13359400  |
| N  | -0.31026600 | 2.88718100  | -1.47548400 |
| N  | -1.04671000 | 1.50612500  | -2.92289300 |
| C  | 4.59701900  | -1.86579400 | -1.09766000 |
| C  | 3.12369100  | -3.15063900 | 1.20687600  |
| C  | 5.51897400  | -1.38455600 | 1.75055400  |
| C  | 3.45184600  | 2.36936700  | -1.98154200 |
| C  | 3.54673500  | 3.79794600  | 0.72864800  |
| C  | 5.69112500  | 1.84136300  | -0.03692100 |
| C  | 1.16853800  | 1.97799800  | 3.64833500  |
| C  | 4.18936400  | 1.65698600  | 3.71668100  |
| C  | 2.45116900  | -0.76590300 | 4.18926200  |
| C  | -0.46956200 | 1.55460400  | -1.68957200 |
| C  | 0.20946800  | 3.45292600  | -0.24642000 |
| C  | -0.77224400 | 3.65504400  | -2.53723400 |
| C  | -0.72300900 | 5.14196700  | -2.54089600 |

|    |             |             |             |
|----|-------------|-------------|-------------|
| C  | -1.24316400 | 2.77136300  | -3.46429800 |
| C  | -1.86370100 | 2.99382200  | -4.79827000 |
| C  | -1.43609700 | 0.28443700  | -3.59674800 |
| Si | -2.48411600 | -0.25766900 | 0.80376200  |
| Si | -3.59472200 | 1.79799800  | 1.32285900  |
| Si | -2.75598800 | -1.46100900 | 2.85902800  |
| Si | -4.13534600 | -1.25283000 | -0.61349900 |
| N  | 1.24531600  | -1.85479700 | -2.63162700 |
| N  | 0.25491400  | -3.10100300 | -1.21291600 |
| C  | -2.78531900 | 2.67216800  | 2.80774500  |
| C  | -3.58716400 | 3.05655800  | -0.11027400 |
| C  | -5.44756700 | 1.64788700  | 1.74880400  |
| C  | -1.43725900 | -0.95357900 | 4.12507300  |
| C  | -2.58149600 | -3.35362800 | 2.65711500  |
| C  | -4.41461800 | -1.21453000 | 3.76351800  |
| C  | -3.47872400 | -2.71111700 | -1.65939800 |
| C  | -5.65396600 | -1.97497800 | 0.28298600  |
| C  | -4.85929300 | -0.00304000 | -1.86407300 |
| C  | 0.50662300  | -1.79440800 | -1.48870100 |
| C  | 1.81484200  | -0.70036900 | -3.29543300 |
| C  | 1.45450300  | -3.16191000 | -3.05673100 |
| C  | 2.23536200  | -3.50067800 | -4.27752000 |
| C  | 0.82046500  | -3.95883800 | -2.14752900 |
| C  | 0.69333700  | -5.43912900 | -2.06678500 |
| C  | -0.46586700 | -3.55217400 | -0.03958100 |
| H  | 4.99473200  | -0.96921200 | -1.58388300 |
| H  | 5.40053400  | -2.61199300 | -1.06770300 |
| H  | 3.79516600  | -2.27156600 | -1.72253800 |
| H  | 2.66073600  | -3.06868400 | 2.19480300  |
| H  | 2.34962100  | -3.43672200 | 0.48909400  |
| H  | 3.86129900  | -3.96174300 | 1.24635000  |
| H  | 5.27588400  | -1.28473300 | 2.81240300  |
| H  | 6.12101000  | -2.29485600 | 1.63431400  |
| H  | 6.14478000  | -0.53332600 | 1.46995600  |
| H  | 3.77770600  | 1.50368300  | -2.56815000 |
| H  | 2.38818900  | 2.52945700  | -2.18526900 |
| H  | 4.00509400  | 3.24167900  | -2.35153400 |
| H  | 4.34663900  | 3.96992000  | 1.45627200  |



|   |             |             |             |
|---|-------------|-------------|-------------|
| H | 3.60328600  | 4.61065400  | -0.00639200 |
| H | 2.60023100  | 3.89329500  | 1.26667600  |
| H | 6.03548100  | 1.78232200  | 1.00017700  |
| H | 6.02300400  | 0.93577800  | -0.55356300 |
| H | 6.19578400  | 2.69572300  | -0.50607500 |
| H | 1.26901200  | 2.95794000  | 3.16807800  |
| H | 0.19668100  | 1.56305500  | 3.36725200  |
| H | 1.16759100  | 2.14128900  | 4.73294400  |
| H | 5.07845900  | 1.07879500  | 3.44824200  |
| H | 4.30071500  | 2.66046300  | 3.29632100  |
| H | 4.17341600  | 1.75679600  | 4.80944000  |
| H | 3.37204700  | -1.35499700 | 4.12864500  |
| H | 2.29568100  | -0.50356700 | 5.24286100  |
| H | 1.62492200  | -1.41326400 | 3.88410700  |
| H | -0.43168800 | -1.04367100 | 3.70797500  |
| H | -0.58359700 | 3.96377900  | 0.30748800  |
| H | 0.60721600  | 2.63785200  | 0.36077100  |
| H | 1.01333500  | 4.15834500  | -0.46398300 |
| H | -1.30093600 | 5.56673300  | -1.71235700 |
| H | 0.30346100  | 5.51652500  | -2.45613100 |
| H | -1.14208700 | 5.53355500  | -3.47007700 |
| H | -2.88668000 | 2.60233500  | -4.84199500 |
| H | -1.91136100 | 4.06187200  | -5.02000300 |
| H | -1.29236600 | 2.51539800  | -5.60249600 |
| H | -0.88242100 | 0.16518200  | -4.53331700 |
| H | -1.21712900 | -0.55217000 | -2.93466000 |
| H | -2.50559400 | 0.29064600  | -3.81915600 |
| H | -2.87329100 | 2.07421100  | 3.72080000  |
| H | -3.27459700 | 3.63593800  | 2.99617200  |
| H | -1.71962700 | 2.86009600  | 2.64410400  |
| H | -2.58370100 | 3.26438500  | -0.48593100 |
| H | -4.02763400 | 4.00181700  | 0.23148700  |
| H | -4.18462600 | 2.69967100  | -0.95445200 |
| H | -6.02784900 | 1.27164400  | 0.90022800  |
| H | -5.83956200 | 2.64246500  | 1.99765500  |
| H | -5.63908100 | 0.99064600  | 2.59974700  |
| H | -1.56617700 | 0.08553800  | 4.44398500  |
| H | -1.49369200 | -1.58577100 | 5.01977400  |

|   |             |             |             |
|---|-------------|-------------|-------------|
| H | -3.18284900 | -3.75310900 | 1.83390400  |
| H | -2.91560700 | -3.84554100 | 3.57877200  |
| H | -1.54044600 | -3.64978300 | 2.49482900  |
| H | -5.28299100 | -1.45230700 | 3.14348900  |
| H | -4.52401400 | -0.18621800 | 4.12186700  |
| H | -4.43879000 | -1.87101000 | 4.64263500  |
| H | -3.32129900 | -3.59391000 | -1.03081300 |
| H | -2.53296800 | -2.48494100 | -2.16155600 |
| H | -4.21473300 | -2.98518200 | -2.42535700 |
| H | -6.19121400 | -1.20975700 | 0.85087700  |
| H | -5.37701800 | -2.77302700 | 0.97929900  |
| H | -6.35177900 | -2.40061100 | -0.44932900 |
| H | -5.54458300 | 0.69162700  | -1.36806200 |
| H | -5.42840700 | -0.52777800 | -2.64160900 |
| H | -4.08761000 | 0.59964300  | -2.35142100 |
| H | 2.90604600  | -0.75834900 | -3.28977100 |
| H | 1.50952200  | 0.19193500  | -2.75069400 |
| H | 1.46748000  | -0.63814500 | -4.33130100 |
| H | 1.79088400  | -3.06928500 | -5.18220300 |
| H | 2.27299500  | -4.58338200 | -4.41433500 |
| H | 3.26837700  | -3.14024700 | -4.21188300 |
| H | -0.35184000 | -5.76296000 | -2.13167900 |
| H | 1.10304600  | -5.82931700 | -1.12833100 |
| H | 1.23745000  | -5.91256000 | -2.88660900 |
| H | -1.23412500 | -4.27526900 | -0.31878800 |
| H | -0.94410700 | -2.68452600 | 0.41644500  |
| H | 0.21927000  | -4.00992200 | 0.67980100  |

**Figure S9.** Optimized geometry of **3**. All hydrogen atoms are omitted for clarity.

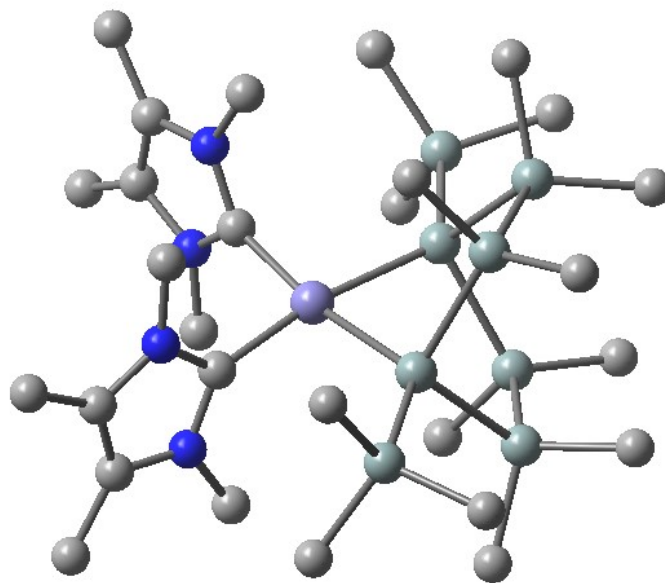

**Table S4.** Cartesian coordinates of optimized structures of **3**.

|    |            |            |            |
|----|------------|------------|------------|
| Fe | -0.0000030 | 0.7071580  | -0.0000780 |
| Si | 1.6693940  | -1.1127630 | -0.1661760 |
| Si | 1.3386640  | -2.6694410 | 1.5980310  |
| Si | -0.9315980 | -2.2590870 | 2.1073490  |
| Si | -1.6695130 | -1.1126230 | 0.1662060  |
| Si | -1.3388720 | -2.6692110 | -1.5980930 |
| Si | 0.9314470  | -2.2590700 | -2.1073550 |
| Si | 4.0251180  | -0.8771050 | -0.3910600 |
| Si | -4.0252650 | -0.8769450 | 0.3909600  |
| N  | 2.0948930  | 2.4938400  | 1.2935120  |
| N  | 1.9941080  | 2.8482120  | -0.8127500 |
| N  | -1.9938610 | 2.8481860  | 0.8129070  |
| N  | -2.0945840 | 2.4945040  | -1.2934770 |
| C  | 4.8408860  | 0.2064320  | 0.9519040  |
| H  | 5.9330030  | 0.1768640  | 0.8506510  |
| H  | 4.5906430  | -0.1453020 | 1.9583490  |
| H  | 4.5262710  | 1.2513620  | 0.8633890  |
| C  | 4.5436690  | -0.1048850 | -2.0573770 |
| H  | 4.2326950  | -0.7293260 | -2.9012890 |
| H  | 5.6341290  | 0.0048790  | -2.1087630 |

|   |            |            |            |
|---|------------|------------|------------|
| H | 4.1013120  | 0.8873890  | -2.1956130 |
| C | 4.9093020  | -2.5616410 | -0.2896840 |
| H | 5.9865650  | -2.4427800 | -0.4616380 |
| H | 4.5247510  | -3.2669620 | -1.0326660 |
| H | 4.7795050  | -3.0197540 | 0.6964870  |
| C | 2.4358290  | -2.2720040 | 3.1186210  |
| H | 2.2858910  | -1.2495660 | 3.4794200  |
| H | 3.4986420  | -2.3904230 | 2.8791560  |
| H | 2.2050750  | -2.9527370 | 3.9465830  |
| C | 1.6949880  | -4.5050530 | 1.2070520  |
| H | 1.0789500  | -4.8741240 | 0.3825310  |
| H | 1.4910760  | -5.1305390 | 2.0842730  |
| H | 2.7446750  | -4.6480280 | 0.9282800  |
| C | -0.9758420 | -1.1010160 | 3.6372950  |
| H | -0.6190510 | -1.6296470 | 4.5289970  |
| H | -1.9926370 | -0.7474710 | 3.8405720  |
| H | -0.3366810 | -0.2225640 | 3.4990120  |
| C | -1.9209920 | -3.8020030 | 2.6514440  |
| H | -1.4417190 | -4.2809840 | 3.5137420  |
| H | -1.9954950 | -4.5437560 | 1.8516690  |
| H | -2.9392120 | -3.5272740 | 2.9499390  |
| C | -4.8408630 | 0.2068790  | -0.9518550 |
| H | -4.5255570 | 1.2516240  | -0.8636620 |
| H | -5.9329580 | 0.1780000  | -0.8501730 |
| H | -4.5912280 | -0.1451970 | -1.9583440 |
| C | -4.5440360 | -0.1050830 | 2.0573730  |
| H | -5.6345590 | 0.0040380  | 2.1088500  |
| H | -4.1022780 | 0.8874600  | 2.1956340  |
| H | -4.2326380 | -0.7293640 | 2.9012460  |
| C | -4.9094870 | -2.5614390 | 0.2892900  |
| H | -4.7788720 | -3.0199760 | -0.6965640 |
| H | -5.9868830 | -2.4424420 | 0.4603010  |
| H | -4.5256130 | -3.2664720 | 1.0329000  |
| C | -2.4356550 | -2.2712200 | -3.1188360 |
| H | -3.4985880 | -2.3891030 | -2.8796340 |
| H | -2.2050480 | -2.9520920 | -3.9467310 |
| H | -2.2851130 | -1.2488690 | -3.4796290 |
| C | -1.6957300 | -4.5048260 | -1.2076390 |

|   |            |            |            |
|---|------------|------------|------------|
| H | -2.7453820 | -4.6475330 | -0.9286300 |
| H | -1.0795890 | -4.8744300 | -0.3834310 |
| H | -1.4922630 | -5.1300530 | -2.0851490 |
| C | 0.9756580  | -1.1007520 | -3.6371130 |
| H | 0.6185670  | -1.6290780 | -4.5288720 |
| H | 1.9925070  | -0.7474070 | -3.8404880 |
| H | 0.3367490  | -0.2221670 | -3.4984930 |
| C | 1.9208710  | -3.8018500 | -2.6517920 |
| H | 2.9387140  | -3.5267440 | -2.9512480 |
| H | 1.4410600  | -4.2812430 | -3.5135610 |
| H | 1.9963700  | -4.5433590 | -1.8518950 |
| C | 1.4692260  | 2.0547460  | 0.1638610  |
| C | 1.9302150  | 1.8745720  | 2.5905290  |
| H | 1.3941800  | 0.9351840  | 2.4408740  |
| H | 1.3678290  | 2.5159020  | 3.2774350  |
| H | 2.9052080  | 1.6500420  | 3.0303260  |
| C | 2.9851520  | 3.5360530  | 1.0307840  |
| C | 3.8093920  | 4.1766670  | 2.0912980  |
| H | 4.5230110  | 3.4722440  | 2.5351350  |
| H | 3.1921430  | 4.5772580  | 2.9039390  |
| H | 4.3850250  | 5.0061960  | 1.6748400  |
| C | 2.9197370  | 3.7623590  | -0.3104650 |
| C | 3.6468130  | 4.7334020  | -1.1722240 |
| H | 4.2747650  | 5.3847500  | -0.5605220 |
| H | 2.9610310  | 5.3734480  | -1.7396390 |
| H | 4.3027740  | 4.2306440  | -1.8931280 |
| C | 1.6083700  | 2.7459800  | -2.2023670 |
| H | 0.8536070  | 3.4953160  | -2.4647870 |
| H | 1.2041670  | 1.7462500  | -2.3721950 |
| H | 2.4783740  | 2.8767270  | -2.8501050 |
| C | -1.4690510 | 2.0549380  | -0.1639310 |
| C | -1.6084300 | 2.7452560  | 2.2025570  |
| H | -2.4785760 | 2.8757130  | 2.8501650  |
| H | -0.8537000 | 3.4944340  | 2.4655320  |
| H | -1.2043160 | 1.7454190  | 2.3719760  |
| C | -3.6462160 | 4.7335870  | 1.1728770  |
| H | -4.2742040 | 5.3850760  | 0.5613640  |
| H | -2.9602490 | 5.3734860  | 1.7402390  |

|   |            |           |            |
|---|------------|-----------|------------|
| H | -4.3021050 | 4.2308340 | 1.8938480  |
| C | -2.9193850 | 3.7625790 | 0.3108720  |
| C | -2.9847390 | 3.5367300 | -1.0304560 |
| C | -3.8088640 | 4.1777700 | -2.0907990 |
| H | -4.3847130 | 5.0069870 | -1.6740190 |
| H | -4.5222940 | 3.4734620 | -2.5351200 |
| H | -3.1915350 | 4.5788760 | -2.9031260 |
| C | -1.9299530 | 1.8755890 | -2.5906690 |
| H | -1.3938980 | 0.9361730 | -2.4412960 |
| H | -1.3676150 | 2.5171150 | -3.2774370 |
| H | -2.9049600 | 1.6511440 | -3.0304820 |

**Table S5.** Actual and calculated bond distances and angles for **3**.

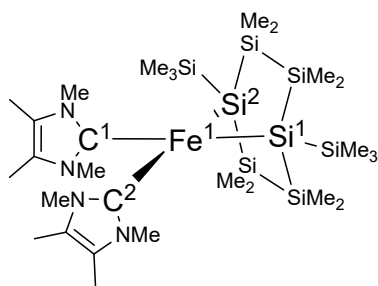

|                   | Actual bond distances / angles | Calculated bond distances / angles |
|-------------------|--------------------------------|------------------------------------|
| Si(1)-Fe(1)       | 2.4091(6) Å                    | 2.47518 Å                          |
| Si(2)-Fe(1)       | 2.4260(6) Å                    | 2.47519 Å                          |
| C(1)-Fe(1)        | 1.987(1) Å                     | 2.00038 Å                          |
| C(2)-Fe(1)        | 1.980(1) Å                     | 2.00037 Å                          |
| Si(1)-Fe(1)-Si(2) | 85.99(2) °                     | 85.34539 °                         |
| C(1)-Fe(1)-C(2)   | 95.96(6) °                     | 95.29077 °                         |
| Si(1)-Fe(1)-C(2)  | 89.74(4) °                     | 90.31615 °                         |
| Si(2)-Fe(1)-C(1)  | 89.67(4) °                     | 90.31252 °                         |

### X-ray data collection and reduction

X-ray crystallography for compounds **2** and **3** were performed on a Rigaku Saturn CCD area detector with graphite monochromated Mo-K $\alpha$  radiation ( $\lambda=0.71075$  Å), and single crystals of **4** suitable for X-ray crystallography were analyzed by synchrotron radiation at beam line BL02B1 ( $\lambda = 0.41440$  Å) of Spring-8 (Hyogo, Japan) using PILATUS3 X CdTe 1M detector. The data were collected at 123 K for **2**, **3** and 133 K for **4** and using  $\omega$  scan in the  $\theta$  range of  $2.31 \leq \theta \leq 31.27$  deg (**2**),  $2.19 \leq \theta \leq 31.29$  deg (**3**),  $0.76 \leq \theta \leq 15.57$  deg (**4**). The data obtained were processed using Crystal-Clear (Rigaku) on a Pentium computer, and were corrected for Lorentz and polarization effects. The structures were solved by direct methods<sup>5</sup>, and expanded using Fourier techniques. Hydrogen atoms were refined using the riding model. The final cycle of full-matrix least-squares refinement on  $F^2$  was based on 6744 observed reflections and 218 variable parameters for **2**, 12586 observed reflections and 392 variable parameters for **3**, 10,527 observed reflections and 444 variable parameters for **4**. Neutral atom scattering factors were taken from International Tables for Crystallography (IT), Vol. C, Table 6.1.1.4<sup>6</sup>. Anomalous dispersion effects were included in  $F_{\text{calc}}$ <sup>7</sup>; the values for  $\Delta f'$  and  $\Delta f''$  were those of Creagh and McAuley<sup>8</sup>. The values for the mass attenuation coefficients are those of Creagh and Hubbell<sup>9</sup>. All calculations were performed using the CrystalStructure<sup>10</sup> crystallographic software package except for refinement, which was performed using SHELXL Version 2017/1<sup>11</sup>. Details of final refinement as well as the bond lengths and angle are summarized in Tables S6, S7 and S8, and the numbering scheme employed is also shown in Figures S10, S11 and S12, which were drawn with ORTEP at 50% probability ellipsoids. CCDC 2258218 (**2**), 2258219 (**3**) and 2258220 (**4**) contain the supplementary crystallographic data for this paper.

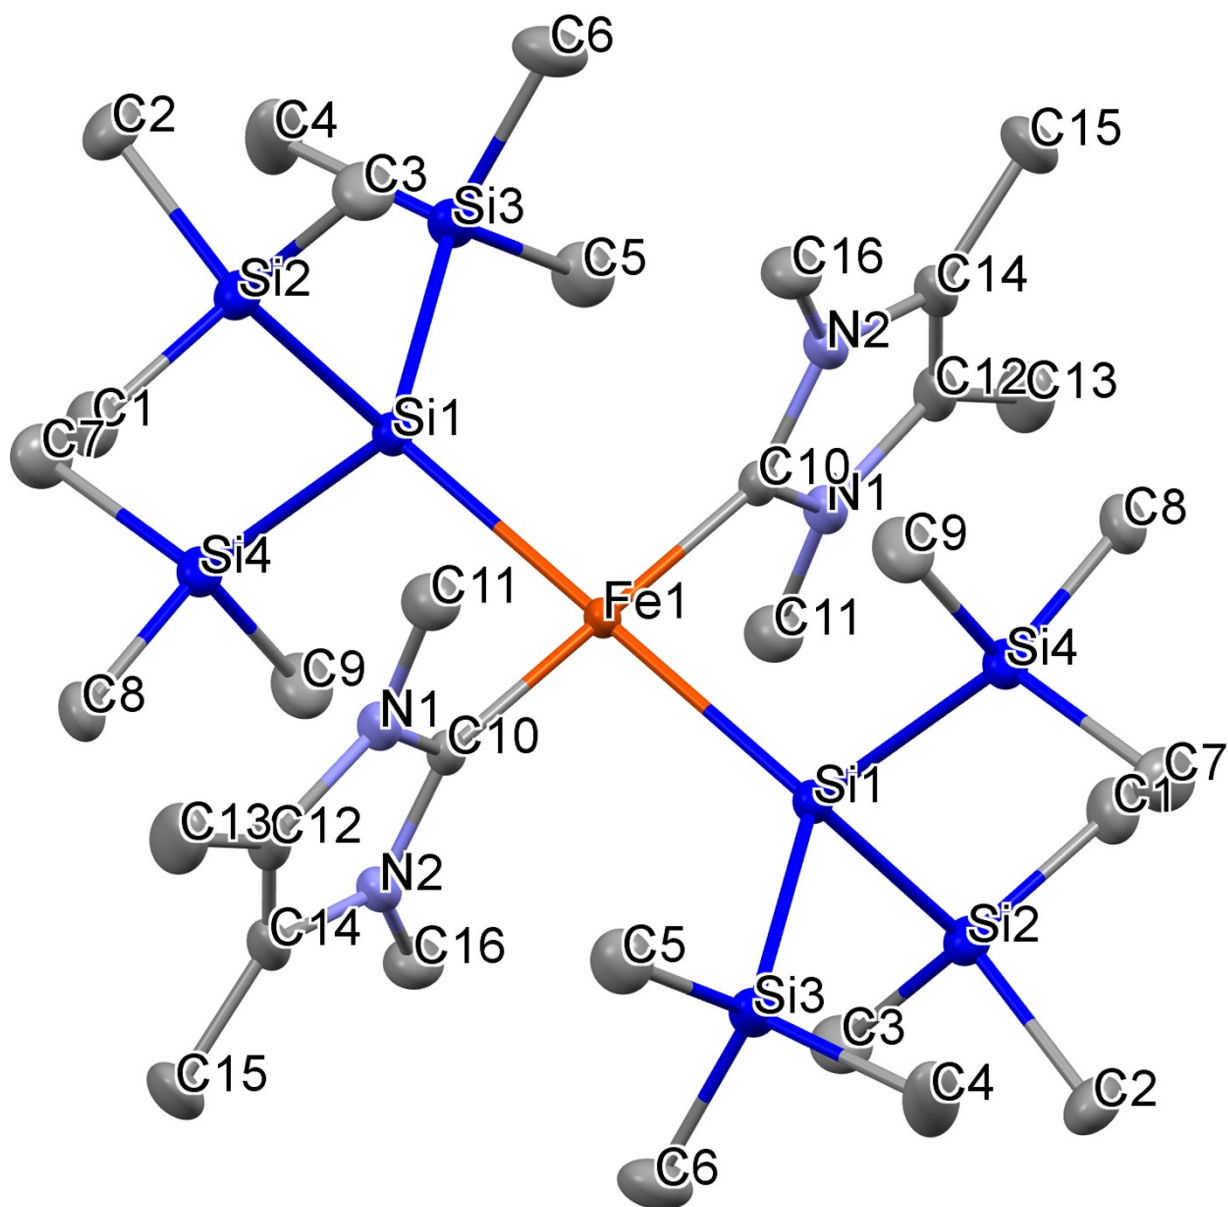

**Figure S10.** ORTEP drawing of 2 (50% probability of the thermal ellipsoids). Hydrogen atoms were omitted for clarity.



**Table S6.** Crystal data and structure refinement for **2**.

|                                                           |                                                                                                                                                                         |
|-----------------------------------------------------------|-------------------------------------------------------------------------------------------------------------------------------------------------------------------------|
| Empirical Formula                                         | C <sub>32</sub> H <sub>78</sub> FeN <sub>4</sub> Si <sub>8</sub>                                                                                                        |
| Formula Weight                                            | 799.53                                                                                                                                                                  |
| Crystal Color, Habit                                      | red, block                                                                                                                                                              |
| Crystal Dimensions                                        | 0.500 X 0.500 X 0.500 mm                                                                                                                                                |
| Crystal System                                            | triclinic                                                                                                                                                               |
| Lattice Type                                              | Primitive                                                                                                                                                               |
| Lattice Parameters                                        | a = 9.4550(3) Å<br>b = 11.6117(3) Å<br>c = 11.8561(3) Å<br>$\alpha$ = 95.209(2) °<br>$\beta$ = 109.339(3) °<br>$\gamma$ = 105.223(2) °<br>V = 1162.32(6) Å <sup>3</sup> |
| Space Group                                               | P-1 (#2)                                                                                                                                                                |
| Z value                                                   | 1                                                                                                                                                                       |
| D <sub>calc</sub>                                         | 1.142 g/cm <sup>3</sup>                                                                                                                                                 |
| F <sub>000</sub>                                          | 436.00                                                                                                                                                                  |
| $\mu$ (MoK $\alpha$ )                                     | 5.557 cm <sup>-1</sup>                                                                                                                                                  |
| Diffractometer                                            | Saturn724                                                                                                                                                               |
| Radiation                                                 | MoK $\alpha$ ( $\lambda$ = 0.71075 Å)<br>graphite monochromated                                                                                                         |
| Voltage, Current                                          | 50kV, 24mA                                                                                                                                                              |
| Temperature                                               | -150.0°C                                                                                                                                                                |
| Detector Aperture                                         | 72.8 x 72.8 mm                                                                                                                                                          |
| Data Images                                               | 1440 exposures                                                                                                                                                          |
| $\omega$ oscillation Range ( $\chi$ =45.0, $\phi$ =0.0)   | -70.0 - 110.0°                                                                                                                                                          |
| Exposure Rate                                             | 2.0 sec./°                                                                                                                                                              |
| Detector Swing Angle                                      | 20.00°                                                                                                                                                                  |
| $\omega$ oscillation Range ( $\chi$ =45.0, $\phi$ =90.0)  | -70.0 - 110.0°                                                                                                                                                          |
| Exposure Rate                                             | 2.0 sec./°                                                                                                                                                              |
| Detector Swing Angle                                      | 20.00°                                                                                                                                                                  |
| $\omega$ oscillation Range ( $\chi$ =45.0, $\phi$ =180.0) | -70.0 - 110.0°                                                                                                                                                          |
| Exposure Rate                                             | 2.0 sec./°                                                                                                                                                              |
| Detector Swing Angle                                      | 20.00°                                                                                                                                                                  |
| $\omega$ oscillation Range ( $\chi$ =45.0, $\phi$ =270.0) | -70.0 - 110.0°                                                                                                                                                          |
| Exposure Rate                                             | 2.0 sec./°                                                                                                                                                              |
| Detector Swing Angle                                      | 20.00°                                                                                                                                                                  |

|                                    |                                                                                                                        |
|------------------------------------|------------------------------------------------------------------------------------------------------------------------|
| Detector Position                  | 45.00 mm                                                                                                               |
| Pixel Size                         | 0.035 mm                                                                                                               |
| $2\theta_{\max}$                   | 62.4°                                                                                                                  |
| No. of Reflections Measured        | Total: 19300<br>Unique: 6744 ( $R_{\text{int}} = 0.0672$ )                                                             |
| Corrections                        | Lorentz-polarization<br>Absorption<br>(trans. factors: 0.243 - 0.757)                                                  |
| Structure Solution                 | Direct Methods (SHELXT Version 2014/5)                                                                                 |
| Refinement                         | Full-matrix least-squares on $F^2$                                                                                     |
| Function Minimized                 | $\Sigma w (F_o^2 - F_c^2)^2$                                                                                           |
| Least Squares Weights              | $w = 1 / [ \sigma^2(F_o^2) + (0.0748 \cdot P)^2 + 0.1103 \cdot P ]$<br>where $P = (\text{Max}(F_o^2, 0) + 2F_c^2) / 3$ |
| $2\theta_{\max}$ cutoff            | 62.4°                                                                                                                  |
| Anomalous Dispersion               | All non-hydrogen atoms                                                                                                 |
| No. Observations (All reflections) | 6744                                                                                                                   |
| No. Variables                      | 218                                                                                                                    |
| Reflection/Parameter Ratio         | 30.94                                                                                                                  |
| Residuals: $R1(I > 2.00\sigma(I))$ | 0.0449                                                                                                                 |
| Residuals: R (All reflections)     | 0.0505                                                                                                                 |
| Residuals: $wR2$ (All reflections) | 0.1233                                                                                                                 |
| Goodness of Fit Indicator          | 1.072                                                                                                                  |
| Max Shift/Error in Final Cycle     | 0.000                                                                                                                  |
| Maximum peak in Final Diff. Map    | 0.87 $e^{-}/\text{\AA}^3$                                                                                              |
| Minimum peak in Final Diff. Map    | -0.85 $e^{-}/\text{\AA}^3$                                                                                             |

Atomic coordinates and  $B_{\text{iso}}/B_{\text{eq}}$  and occupancy

| atom | x           | y           | z           | $B_{\text{eq}}$ | occ |
|------|-------------|-------------|-------------|-----------------|-----|
| Fe1  | 0.50000     | 0.50000     | 0.50000     | 1.117(7)        | 1/2 |
| Si1  | 0.33740(4)  | 0.32428(3)  | 0.32077(3)  | 1.244(8)        | 1   |
| Si2  | 0.47500(5)  | 0.24754(4)  | 0.21330(4)  | 1.603(8)        | 1   |
| Si3  | 0.17849(5)  | 0.13730(4)  | 0.34085(4)  | 1.641(9)        | 1   |
| Si4  | 0.15066(5)  | 0.37940(4)  | 0.16587(3)  | 1.587(8)        | 1   |
| N1   | 0.31575(15) | 0.38747(11) | 0.64332(11) | 1.596(19)       | 1   |
| N2   | 0.49671(15) | 0.30680(11) | 0.65394(11) | 1.70(2)         | 1   |
| C1   | 0.5440(2)   | 0.35322(16) | 0.11718(15) | 2.31(3)         | 1   |
| C2   | 0.3602(2)   | 0.09863(15) | 0.10213(15) | 2.51(3)         | 1   |
| C3   | 0.65052(19) | 0.21297(16) | 0.31907(15) | 2.30(3)         | 1   |
| C4   | 0.0333(2)   | 0.03752(17) | 0.19130(16) | 3.28(4)         | 1   |
| C5   | 0.04849(19) | 0.15062(16) | 0.42789(16) | 2.39(3)         | 1   |
| C6   | 0.2957(2)   | 0.03955(15) | 0.41750(17) | 2.73(3)         | 1   |
| C7   | 0.0062(2)   | 0.25906(16) | 0.02984(15) | 2.83(3)         | 1   |
| C8   | 0.2449(2)   | 0.49878(15) | 0.09351(14) | 2.24(3)         | 1   |
| C9   | 0.02369(19) | 0.43857(16) | 0.23444(16) | 2.46(3)         | 1   |
| C10  | 0.43598(17) | 0.39206(12) | 0.60381(12) | 1.45(2)         | 1   |
| C11  | 0.20449(19) | 0.45299(15) | 0.59966(15) | 2.13(3)         | 1   |
| C12  | 0.30400(19) | 0.30291(13) | 0.71884(13) | 1.96(2)         | 1   |
| C13  | 0.1815(2)   | 0.28198(17) | 0.77413(17) | 2.86(3)         | 1   |
| C14  | 0.4178(2)   | 0.25258(13) | 0.72576(13) | 2.03(3)         | 1   |
| C15  | 0.4644(3)   | 0.15809(16) | 0.79323(17) | 3.06(3)         | 1   |
| C16  | 0.63081(19) | 0.28079(15) | 0.63799(15) | 2.27(3)         | 1   |

$$B_{\text{eq}} = 8/3 \pi^2 (U_{11}(\text{aa}^*)^2 + U_{22}(\text{bb}^*)^2 + U_{33}(\text{cc}^*)^2 + 2U_{12}(\text{aa}^*\text{bb}^*)\cos \gamma + 2U_{13}(\text{aa}^*\text{cc}^*)\cos \beta + 2U_{23}(\text{bb}^*\text{cc}^*)\cos \alpha)$$

## Anisotropic displacement parameters

| Atom | U11         | U22         | U33         | U12         | U13         | U23         |
|------|-------------|-------------|-------------|-------------|-------------|-------------|
| Fe1  | 0.01812(14) | 0.01231(14) | 0.01107(14) | 0.00367(10) | 0.00494(10) | 0.00273(10) |
| Si1  | 0.01825(18) | 0.01429(18) | 0.01231(18) | 0.00377(14) | 0.00366(14) | 0.00242(13) |
| Si2  | 0.0227(2)   | 0.0199(2)   | 0.01717(19) | 0.00753(15) | 0.00584(15) | 0.00141(15) |
| Si3  | 0.0231(2)   | 0.01560(19) | 0.01766(19) | 0.00073(15) | 0.00433(15) | 0.00231(15) |
| Si4  | 0.0215(2)   | 0.0209(2)   | 0.01546(19) | 0.00814(15) | 0.00276(15) | 0.00264(15) |
| N1   | 0.0281(6)   | 0.0165(5)   | 0.0167(6)   | 0.0034(5)   | 0.0114(5)   | 0.0048(4)   |
| N2   | 0.0314(7)   | 0.0160(5)   | 0.0164(6)   | 0.0065(5)   | 0.0081(5)   | 0.0052(4)   |
| C1   | 0.0329(8)   | 0.0340(9)   | 0.0230(7)   | 0.0099(7)   | 0.0130(6)   | 0.0065(6)   |
| C2   | 0.0396(9)   | 0.0270(8)   | 0.0256(8)   | 0.0108(7)   | 0.0101(7)   | -0.0030(6)  |

|     |            |           |            |            |            |           |
|-----|------------|-----------|------------|------------|------------|-----------|
| C3  | 0.0286(8)  | 0.0301(8) | 0.0299(8)  | 0.0149(6)  | 0.0078(6)  | 0.0058(6) |
| C4  | 0.0486(11) | 0.0280(9) | 0.0240(8)  | -0.0145(8) | 0.0053(8)  | 0.0005(7) |
| C5  | 0.0271(8)  | 0.0288(8) | 0.0309(8)  | 0.0017(6)  | 0.0108(6)  | 0.0061(7) |
| C6  | 0.0388(9)  | 0.0214(8) | 0.0440(10) | 0.0103(7)  | 0.0137(8)  | 0.0120(7) |
| C7  | 0.0342(9)  | 0.0311(9) | 0.0260(8)  | 0.0078(7)  | -0.0059(7) | 0.0004(7) |
| C8  | 0.0379(9)  | 0.0299(8) | 0.0175(7)  | 0.0135(7)  | 0.0076(6)  | 0.0076(6) |
| C9  | 0.0307(8)  | 0.0388(9) | 0.0304(8)  | 0.0187(7)  | 0.0124(7)  | 0.0104(7) |
| C10 | 0.0255(7)  | 0.0145(6) | 0.0123(6)  | 0.0034(5)  | 0.0056(5)  | 0.0018(5) |
| C11 | 0.0296(8)  | 0.0253(7) | 0.0280(8)  | 0.0083(6)  | 0.0131(6)  | 0.0063(6) |
| C12 | 0.0352(8)  | 0.0190(7) | 0.0164(6)  | -0.0006(6) | 0.0118(6)  | 0.0035(5) |
| C13 | 0.0470(10) | 0.0319(9) | 0.0302(9)  | 0.0002(8)  | 0.0237(8)  | 0.0072(7) |
| C14 | 0.0397(9)  | 0.0172(7) | 0.0158(6)  | 0.0025(6)  | 0.0089(6)  | 0.0054(5) |
| C15 | 0.0621(12) | 0.0260(8) | 0.0270(8)  | 0.0126(8)  | 0.0136(8)  | 0.0147(7) |
| C16 | 0.0344(8)  | 0.0241(7) | 0.0285(8)  | 0.0129(6)  | 0.0096(7)  | 0.0054(6) |

The general temperature factor expression:  $\exp(-2\pi^2(a^2U_{11}h^2 + b^2U_{22}k^2 + c^2U_{33}l^2 + 2a*b*U_{12}hk + 2a*c*U_{13}hl + 2b*c*U_{23}kl))$

#### Bond lengths (Å)

| Atom | atom | distance   | atom | atom | distance   |
|------|------|------------|------|------|------------|
| Fe1  | Si1  | 2.5385(3)  | Fe1  | Si11 | 2.5385(3)  |
| Fe1  | C10  | 1.9563(15) | Fe1  | C101 | 1.9563(15) |
| Si1  | Si2  | 2.3687(7)  | Si1  | Si3  | 2.3761(6)  |
| Si1  | Si4  | 2.3578(5)  | Si2  | C1   | 1.886(2)   |
| Si2  | C2   | 1.8863(15) | Si2  | C3   | 1.8843(18) |
| Si3  | C4   | 1.8841(16) | Si3  | C5   | 1.874(2)   |
| Si3  | C6   | 1.877(2)   | Si4  | C7   | 1.8838(14) |
| Si4  | C8   | 1.8774(19) | Si4  | C9   | 1.885(2)   |
| N1   | C10  | 1.356(2)   | N1   | C11  | 1.444(2)   |
| N1   | C12  | 1.395(2)   | N2   | C10  | 1.357(2)   |
| N2   | C14  | 1.396(2)   | N2   | C16  | 1.444(3)   |
| C12  | C13  | 1.488(3)   | C12  | C14  | 1.337(3)   |
| C14  | C15  | 1.489(3)   |      |      |            |

#### Symmetry Operators:

(1) -X+1,-Y+1,-Z+1

#### Bond angles (°)

| atom | atom | atom | angle       | atom | atom | atom | angle    |
|------|------|------|-------------|------|------|------|----------|
| Si1  | Fe1  | Si11 | 180.000(18) | Si1  | Fe1  | C10  | 87.35(3) |

|      |     |      |             |      |     |      |             |
|------|-----|------|-------------|------|-----|------|-------------|
| Si1  | Fe1 | C101 | 92.65(3)    | Si11 | Fe1 | C10  | 92.65(3)    |
| Si11 | Fe1 | C101 | 87.35(3)    | C10  | Fe1 | C101 | 180.00(9)   |
| Fe1  | Si1 | Si2  | 116.914(16) | Fe1  | Si1 | Si3  | 122.511(19) |
| Fe1  | Si1 | Si4  | 111.867(18) | Si2  | Si1 | Si3  | 99.22(2)    |
| Si2  | Si1 | Si4  | 102.28(2)   | Si3  | Si1 | Si4  | 101.099(19) |
| Si1  | Si2 | C1   | 113.15(7)   | Si1  | Si2 | C2   | 115.85(7)   |
| Si1  | Si2 | C3   | 111.82(7)   | C1   | Si2 | C2   | 103.64(8)   |
| C1   | Si2 | C3   | 108.57(8)   | C2   | Si2 | C3   | 102.96(8)   |
| Si1  | Si3 | C4   | 113.95(7)   | Si1  | Si3 | C5   | 115.65(6)   |
| Si1  | Si3 | C6   | 113.35(6)   | C4   | Si3 | C5   | 102.43(9)   |
| C4   | Si3 | C6   | 104.95(9)   | C5   | Si3 | C6   | 105.28(9)   |
| Si1  | Si4 | C7   | 118.92(7)   | Si1  | Si4 | C8   | 112.64(6)   |
| Si1  | Si4 | C9   | 108.35(6)   | C7   | Si4 | C8   | 102.48(7)   |
| C7   | Si4 | C9   | 104.60(8)   | C8   | Si4 | C9   | 109.27(9)   |
| C10  | N1  | C11  | 122.72(14)  | C10  | N1  | C12  | 111.83(14)  |
| C11  | N1  | C12  | 125.08(16)  | C10  | N2  | C14  | 111.59(15)  |
| C10  | N2  | C16  | 123.29(15)  | C14  | N2  | C16  | 125.07(14)  |
| Fe1  | C10 | N1   | 126.15(12)  | Fe1  | C10 | N2   | 130.36(13)  |
| N1   | C10 | N2   | 103.49(13)  | N1   | C12 | C13  | 121.81(17)  |
| N1   | C12 | C14  | 106.41(16)  | C13  | C12 | C14  | 131.78(16)  |
| N2   | C14 | C12  | 106.65(14)  | N2   | C14 | C15  | 122.10(18)  |
| C12  | C14 | C15  | 131.24(19)  |      |     |      |             |

Symmetry Operators:

(1) -X+1,-Y+1,-Z+1

#### Torsion Angles(°)

(Those having bond angles > 160 or < 20 degrees are excluded.)

| atom1 | atom2 | atom3 | atom4 | angle      | atom1 | atom2 | atom3 | atom4 | angle      |
|-------|-------|-------|-------|------------|-------|-------|-------|-------|------------|
| Si1   | Fe1   | C10   | N1    | -97.20(8)  | Si1   | Fe1   | C10   | N2    | 83.32(9)   |
| C10   | Fe1   | Si1   | Si2   | -117.10(5) | C10   | Fe1   | Si1   | Si3   | 5.35(5)    |
| C10   | Fe1   | Si1   | Si4   | 125.47(5)  | Si1   | Fe1   | C101  | N11   | -82.80(8)  |
| Si1   | Fe1   | C101  | N21   | 96.68(9)   | C101  | Fe1   | Si1   | Si2   | 62.90(5)   |
| C101  | Fe1   | Si1   | Si3   | -174.65(5) | C101  | Fe1   | Si1   | Si4   | -54.53(5)  |
| Si11  | Fe1   | C10   | N1    | 82.80(8)   | Si11  | Fe1   | C10   | N2    | -96.68(9)  |
| C10   | Fe1   | Si11  | Si21  | -62.90(5)  | C10   | Fe1   | Si11  | Si31  | 174.65(5)  |
| C10   | Fe1   | Si11  | Si41  | 54.53(5)   | Si11  | Fe1   | C101  | N11   | 97.20(8)   |
| Si11  | Fe1   | C101  | N21   | -83.32(9)  | C101  | Fe1   | Si11  | Si21  | 117.10(5)  |
| C101  | Fe1   | Si11  | Si31  | -5.35(5)   | C101  | Fe1   | Si11  | Si41  | -125.47(5) |

|     |     |     |     |             |     |     |     |     |             |
|-----|-----|-----|-----|-------------|-----|-----|-----|-----|-------------|
| Fe1 | Si1 | Si2 | C1  | -72.39(2)   | Fe1 | Si1 | Si2 | C2  | 168.132(19) |
| Fe1 | Si1 | Si2 | C3  | 50.59(3)    | Fe1 | Si1 | Si3 | C4  | 165.88(2)   |
| Fe1 | Si1 | Si3 | C5  | 47.55(3)    | Fe1 | Si1 | Si3 | C6  | -74.16(3)   |
| Fe1 | Si1 | Si4 | C7  | -175.10(2)  | Fe1 | Si1 | Si4 | C8  | 65.04(3)    |
| Fe1 | Si1 | Si4 | C9  | -55.97(2)   | Si2 | Si1 | Si3 | C4  | -63.78(3)   |
| Si2 | Si1 | Si3 | C5  | 177.89(2)   | Si2 | Si1 | Si3 | C6  | 56.17(3)    |
| Si3 | Si1 | Si2 | C1  | 153.742(18) | Si3 | Si1 | Si2 | C2  | 34.26(3)    |
| Si3 | Si1 | Si2 | C3  | -83.28(2)   | Si2 | Si1 | Si4 | C7  | 58.99(3)    |
| Si2 | Si1 | Si4 | C8  | -60.87(3)   | Si2 | Si1 | Si4 | C9  | 178.121(18) |
| Si4 | Si1 | Si2 | C1  | 50.16(2)    | Si4 | Si1 | Si2 | C2  | -69.32(3)   |
| Si4 | Si1 | Si2 | C3  | 173.13(2)   | Si3 | Si1 | Si4 | C7  | -43.11(3)   |
| Si3 | Si1 | Si4 | C8  | -162.98(2)  | Si3 | Si1 | Si4 | C9  | 76.01(2)    |
| Si4 | Si1 | Si3 | C4  | 40.78(3)    | Si4 | Si1 | Si3 | C5  | -77.55(3)   |
| Si4 | Si1 | Si3 | C6  | 160.73(2)   | C11 | N1  | C10 | Fe1 | 8.30(16)    |
| C11 | N1  | C10 | N2  | -172.11(10) | C10 | N1  | C12 | C13 | 179.64(9)   |
| C10 | N1  | C12 | C14 | -0.68(13)   | C12 | N1  | C10 | Fe1 | -178.28(8)  |
| C12 | N1  | C10 | N2  | 1.31(12)    | C11 | N1  | C12 | C13 | -7.12(18)   |
| C11 | N1  | C12 | C14 | 172.56(10)  | C10 | N2  | C14 | C12 | 1.13(13)    |
| C10 | N2  | C14 | C15 | -178.54(9)  | C14 | N2  | C10 | Fe1 | 178.08(9)   |
| C14 | N2  | C10 | N1  | -1.48(12)   | C16 | N2  | C10 | Fe1 | 0.61(17)    |
| C16 | N2  | C10 | N1  | -178.96(10) | C16 | N2  | C14 | C12 | 178.55(10)  |
| C16 | N2  | C14 | C15 | -1.11(17)   | N1  | C12 | C14 | N2  | -0.26(12)   |
| N1  | C12 | C14 | C15 | 179.36(10)  | C13 | C12 | C14 | N2  | 179.37(12)  |
| C13 | C12 | C14 | C15 | -1.0(2)     |     |     |     |     |             |

Symmetry Operators:

(1) -X+1,-Y+1,-Z+1

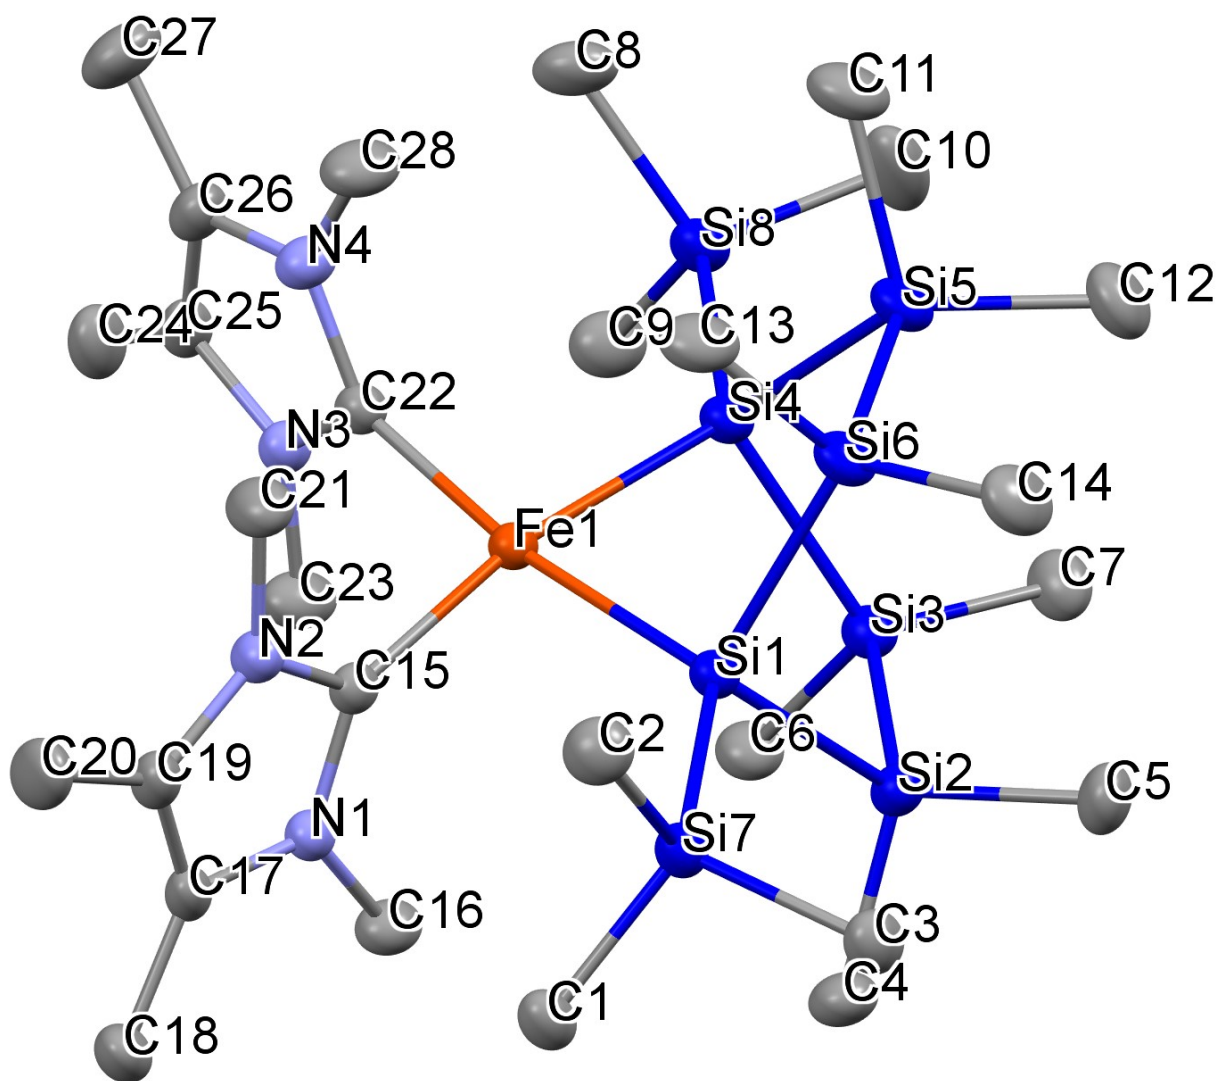

**Figure S11.** ORTEP drawing of **3** (50% probability of the thermal ellipsoids). Hydrogen atoms were omitted for clarity.

**Table S7.** Crystal data and structure refinement for **3**.

|                                      |                                                                                                               |
|--------------------------------------|---------------------------------------------------------------------------------------------------------------|
| Empirical Formula                    | C <sub>28</sub> H <sub>66</sub> FeN <sub>4</sub> Si <sub>8</sub>                                              |
| Formula Weight                       | 739.39                                                                                                        |
| Crystal Color, Habit                 | red, platelet                                                                                                 |
| Crystal Dimensions                   | 0.200 X 0.200 X 0.100 mm                                                                                      |
| Crystal System                       | monoclinic                                                                                                    |
| Lattice Type                         | Primitive                                                                                                     |
| Lattice Parameters                   | a = 10.1857(2) Å<br>b = 22.6499(6) Å<br>c = 18.6628(5) Å<br>β = 93.809(2) °<br>V = 4296.09(18) Å <sup>3</sup> |
| Space Group                          | P2 <sub>1</sub> /n (#14)                                                                                      |
| Z value                              | 4                                                                                                             |
| D <sub>calc</sub>                    | 1.143 g/cm <sup>3</sup>                                                                                       |
| F <sub>000</sub>                     | 1600.00                                                                                                       |
| μ(MoKα)                              | 5.964 cm <sup>-1</sup>                                                                                        |
| Diffractometer                       | Saturn724                                                                                                     |
| Radiation                            | MoKα (λ = 0.71075 Å)<br>graphite monochromated                                                                |
| Voltage, Current                     | 50kV, 24mA                                                                                                    |
| Temperature                          | -150.0°C                                                                                                      |
| Detector Aperture                    | 72.8 x 72.8 mm                                                                                                |
| Data Images                          | 720 exposures                                                                                                 |
| ω oscillation Range (χ=45.0, φ=0.0)  | -70.0 - 110.0°                                                                                                |
| Exposure Rate                        | 12.0 sec./°                                                                                                   |
| Detector Swing Angle                 | 20.00°                                                                                                        |
| ω oscillation Range (χ=45.0, φ=90.0) | -70.0 - 110.0°                                                                                                |
| Exposure Rate                        | 12.0 sec./°                                                                                                   |
| Detector Swing Angle                 | 20.00°                                                                                                        |
| Detector Position                    | 45.00 mm                                                                                                      |
| Pixel Size                           | 0.035 mm                                                                                                      |
| 2θ <sub>max</sub>                    | 62.5°                                                                                                         |
| No. of Reflections Measured          | Total: 40854<br>Unique: 12586 (R <sub>int</sub> = 0.0292)                                                     |
| Corrections                          | Lorentz-polarization<br>Absorption<br>(trans. factors: 0.674 - 0.942)                                         |



|                                    |                                                                     |
|------------------------------------|---------------------------------------------------------------------|
| Structure Solution                 | Direct Methods (SHELXT Version 2014/5)                              |
| Refinement                         | Full-matrix least-squares on F <sup>2</sup>                         |
| Function Minimized                 | $\Sigma w (F_o^2 - F_c^2)^2$                                        |
| Least Squares Weights              | $w = 1 / [ \sigma^2(F_o^2) + (0.0411 \cdot P)^2 + 0.6263 \cdot P ]$ |
|                                    | where $P = (\text{Max}(F_o^2, 0) + 2F_c^2) / 3$                     |
| $2\theta_{\text{max}}$ cutoff      | 62.5°                                                               |
| Anomalous Dispersion               | All non-hydrogen atoms                                              |
| No. Observations (All reflections) | 12586                                                               |
| No. Variables                      | 392                                                                 |
| Reflection/Parameter Ratio         | 32.11                                                               |
| Residuals: R1(I>2.00σ(I))          | 0.0338                                                              |
| Residuals: R (All reflections)     | 0.0499                                                              |
| Residuals: wR2 (All reflections)   | 0.0839                                                              |
| Goodness of Fit Indicator          | 1.031                                                               |
| Max Shift/Error in Final Cycle     | 0.002                                                               |
| Maximum peak in Final Diff. Map    | 0.41 e <sup>-</sup> /Å <sup>3</sup>                                 |
| Minimum peak in Final Diff. Map    | -0.24 e <sup>-</sup> /Å <sup>3</sup>                                |

Atomic coordinates and  $B_{\text{iso}}/B_{\text{eq}}$ 

| Atom | x           | y          | z           | $B_{\text{eq}}$ |
|------|-------------|------------|-------------|-----------------|
| Fe1  | 0.46521(2)  | 0.69987(2) | 0.27085(2)  | 1.408(4)        |
| Si1  | 0.56887(4)  | 0.61794(2) | 0.21470(2)  | 1.463(6)        |
| Si2  | 0.47266(4)  | 0.60438(2) | 0.09878(2)  | 1.809(7)        |
| Si3  | 0.39581(4)  | 0.69964(2) | 0.07205(2)  | 1.755(6)        |
| Si4  | 0.50663(4)  | 0.75492(2) | 0.16315(2)  | 1.572(6)        |
| Si5  | 0.72831(4)  | 0.74545(2) | 0.13786(2)  | 2.032(7)        |
| Si6  | 0.77705(4)  | 0.65672(2) | 0.19830(2)  | 1.974(7)        |
| Si7  | 0.60882(4)  | 0.52321(2) | 0.26189(2)  | 1.723(6)        |
| Si8  | 0.44436(4)  | 0.85294(2) | 0.13934(2)  | 1.933(7)        |
| N1   | 0.29839(11) | 0.61080(5) | 0.34566(6)  | 1.724(19)       |
| N2   | 0.46484(12) | 0.63739(5) | 0.41238(6)  | 1.91(2)         |
| N3   | 0.28108(11) | 0.79267(5) | 0.31606(6)  | 1.737(19)       |
| N4   | 0.47482(12) | 0.81668(5) | 0.35397(6)  | 1.99(2)         |
| C1   | 0.46139(15) | 0.48606(6) | 0.29676(8)  | 2.26(2)         |
| C2   | 0.73750(17) | 0.52382(7) | 0.33905(9)  | 2.66(3)         |
| C3   | 0.66864(16) | 0.47163(7) | 0.19214(8)  | 2.39(3)         |
| C4   | 0.32817(16) | 0.55182(7) | 0.09720(9)  | 2.61(3)         |
| C5   | 0.58480(18) | 0.57467(7) | 0.03131(8)  | 2.78(3)         |
| C6   | 0.21228(15) | 0.69796(7) | 0.08245(9)  | 2.43(3)         |
| C7   | 0.41492(16) | 0.72413(8) | -0.02354(8) | 2.67(3)         |
| C8   | 0.50752(18) | 0.90808(7) | 0.20811(10) | 3.04(3)         |
| C9   | 0.26097(16) | 0.86163(7) | 0.13356(10) | 2.80(3)         |
| C10  | 0.5041(2)   | 0.87881(8) | 0.05175(10) | 3.77(4)         |
| C11  | 0.82995(16) | 0.80818(7) | 0.17996(10) | 3.00(3)         |
| C12  | 0.77221(17) | 0.74358(8) | 0.04124(9)  | 3.10(3)         |
| C13  | 0.85638(16) | 0.67757(7) | 0.28937(9)  | 2.80(3)         |
| C14  | 0.89868(16) | 0.60738(8) | 0.15538(10) | 3.01(3)         |
| C15  | 0.40622(13) | 0.64603(6) | 0.34587(7)  | 1.62(2)         |
| C16  | 0.20826(15) | 0.60117(7) | 0.28337(8)  | 2.31(3)         |
| C17  | 0.29032(15) | 0.58100(6) | 0.41087(8)  | 2.07(2)         |
| C18  | 0.18354(17) | 0.53863(7) | 0.42319(9)  | 2.91(3)         |
| C19  | 0.39554(16) | 0.59796(6) | 0.45269(8)  | 2.15(2)         |
| C20  | 0.4423(2)   | 0.58045(8) | 0.52681(8)  | 3.28(3)         |
| C21  | 0.58398(16) | 0.66789(7) | 0.43779(8)  | 2.63(3)         |
| C22  | 0.40706(13) | 0.77386(6) | 0.31641(7)  | 1.66(2)         |
| C23  | 0.17142(15) | 0.75836(7) | 0.28604(9)  | 2.63(3)         |

|     |             |            |             |         |
|-----|-------------|------------|-------------|---------|
| C24 | 0.14141(17) | 0.87638(7) | 0.35511(9)  | 2.83(3) |
| C25 | 0.26985(15) | 0.84604(6) | 0.35181(8)  | 2.05(2) |
| C26 | 0.39181(16) | 0.86115(6) | 0.37631(8)  | 2.29(3) |
| C27 | 0.4423(2)   | 0.91336(8) | 0.41806(10) | 3.65(4) |
| C28 | 0.61643(16) | 0.81748(7) | 0.36531(10) | 2.83(3) |

$$B_{\text{eq}} = 8/3 \pi^2 (U_{11}(aa^*)^2 + U_{22}(bb^*)^2 + U_{33}(cc^*)^2 + 2U_{12}(aa^*bb^*)\cos \gamma + 2U_{13}(aa^*cc^*)\cos \beta + 2U_{23}(bb^*cc^*)\cos \alpha)$$

#### Anisotropic displacement parameters

| Atom | U11         | U22         | U33         | U12          | U13          | U23          |
|------|-------------|-------------|-------------|--------------|--------------|--------------|
| Fe1  | 0.01813(9)  | 0.01652(10) | 0.01875(10) | 0.00045(7)   | 0.00044(7)   | 0.00101(7)   |
| Si1  | 0.01830(17) | 0.01708(18) | 0.02025(18) | 0.00098(13)  | 0.00154(14)  | 0.00176(13)  |
| Si2  | 0.0282(2)   | 0.02008(19) | 0.02030(19) | 0.00003(15)  | 0.00048(15)  | -0.00005(14) |
| Si3  | 0.02260(19) | 0.0227(2)   | 0.02101(19) | -0.00045(14) | -0.00161(15) | 0.00304(15)  |
| Si4  | 0.01954(18) | 0.01789(18) | 0.02220(19) | -0.00038(13) | 0.00065(14)  | 0.00312(14)  |
| Si5  | 0.02004(19) | 0.0251(2)   | 0.0323(2)   | -0.00230(15) | 0.00332(16)  | 0.00656(16)  |
| Si6  | 0.01724(18) | 0.0244(2)   | 0.0336(2)   | 0.00051(14)  | 0.00304(16)  | 0.00477(16)  |
| Si7  | 0.02394(19) | 0.01872(18) | 0.02299(19) | 0.00341(14)  | 0.00285(15)  | 0.00309(14)  |
| Si8  | 0.0272(2)   | 0.01902(19) | 0.0273(2)   | 0.00067(15)  | 0.00246(16)  | 0.00545(15)  |
| N1   | 0.0232(6)   | 0.0206(6)   | 0.0220(6)   | -0.0010(4)   | 0.0039(5)    | -0.0008(4)   |
| N2   | 0.0291(6)   | 0.0233(6)   | 0.0198(6)   | -0.0028(5)   | 0.0004(5)    | 0.0003(5)    |
| N3   | 0.0235(6)   | 0.0193(6)   | 0.0234(6)   | 0.0017(4)    | 0.0027(5)    | -0.0001(4)   |
| N4   | 0.0269(6)   | 0.0222(6)   | 0.0261(6)   | -0.0002(5)   | -0.0024(5)   | -0.0019(5)   |
| C1   | 0.0324(8)   | 0.0228(7)   | 0.0315(8)   | 0.0020(6)    | 0.0086(6)    | 0.0044(6)    |
| C2   | 0.0376(9)   | 0.0302(8)   | 0.0325(8)   | 0.0046(7)    | -0.0042(7)   | 0.0055(7)    |
| C3   | 0.0334(8)   | 0.0251(8)   | 0.0331(8)   | 0.0055(6)    | 0.0071(7)    | 0.0015(6)    |
| C4   | 0.0386(9)   | 0.0264(8)   | 0.0336(9)   | -0.0063(6)   | -0.0020(7)   | -0.0033(6)   |
| C5   | 0.0479(10)  | 0.0336(9)   | 0.0250(8)   | 0.0031(7)    | 0.0083(7)    | -0.0025(6)   |
| C6   | 0.0259(8)   | 0.0328(8)   | 0.0331(8)   | -0.0030(6)   | -0.0032(6)   | 0.0006(6)    |
| C7   | 0.0343(9)   | 0.0418(9)   | 0.0245(8)   | -0.0002(7)   | -0.0033(6)   | 0.0068(7)    |
| C8   | 0.0451(10)  | 0.0219(8)   | 0.0472(10)  | -0.0056(7)   | -0.0083(8)   | 0.0039(7)    |
| C9   | 0.0314(8)   | 0.0295(8)   | 0.0446(10)  | 0.0052(6)    | -0.0036(7)   | 0.0028(7)    |
| C10  | 0.0690(13)  | 0.0311(9)   | 0.0461(11)  | 0.0105(9)    | 0.0246(10)   | 0.0165(8)    |
| C11  | 0.0278(8)   | 0.0349(9)   | 0.0504(11)  | -0.0087(7)   | -0.0024(7)   | 0.0083(8)    |
| C12  | 0.0330(9)   | 0.0467(10)  | 0.0395(10)  | 0.0009(7)    | 0.0128(7)    | 0.0084(8)    |
| C13  | 0.0253(8)   | 0.0336(9)   | 0.0464(10)  | -0.0039(6)   | -0.0065(7)   | 0.0040(7)    |
| C14  | 0.0247(8)   | 0.0382(9)   | 0.0525(11)  | 0.0042(7)    | 0.0110(7)    | 0.0019(8)    |
| C15  | 0.0220(7)   | 0.0186(6)   | 0.0210(7)   | 0.0019(5)    | 0.0027(5)    | -0.0015(5)   |
| C16  | 0.0256(7)   | 0.0277(8)   | 0.0341(8)   | -0.0018(6)   | -0.0020(6)   | -0.0024(6)   |

|     |            |            |            |            |            |            |
|-----|------------|------------|------------|------------|------------|------------|
| C17 | 0.0358(8)  | 0.0204(7)  | 0.0236(7)  | -0.0017(6) | 0.0115(6)  | -0.0024(5) |
| C18 | 0.0437(10) | 0.0321(9)  | 0.0370(9)  | -0.0101(7) | 0.0175(7)  | -0.0039(7) |
| C19 | 0.0391(9)  | 0.0227(7)  | 0.0205(7)  | -0.0016(6) | 0.0070(6)  | 0.0006(5)  |
| C20 | 0.0627(12) | 0.0395(10) | 0.0227(8)  | -0.0079(8) | 0.0055(8)  | 0.0058(7)  |
| C21 | 0.0357(9)  | 0.0370(9)  | 0.0260(8)  | -0.0082(7) | -0.0061(7) | 0.0019(6)  |
| C22 | 0.0240(7)  | 0.0191(7)  | 0.0199(7)  | -0.0005(5) | 0.0007(5)  | 0.0018(5)  |
| C23 | 0.0227(7)  | 0.0290(8)  | 0.0476(10) | -0.0000(6) | -0.0015(7) | -0.0024(7) |
| C24 | 0.0421(10) | 0.0302(8)  | 0.0368(9)  | 0.0096(7)  | 0.0140(7)  | 0.0006(7)  |
| C25 | 0.0360(8)  | 0.0181(7)  | 0.0245(7)  | 0.0035(6)  | 0.0073(6)  | 0.0019(5)  |
| C26 | 0.0419(9)  | 0.0205(7)  | 0.0246(7)  | 0.0007(6)  | 0.0034(6)  | -0.0026(6) |
| C27 | 0.0602(13) | 0.0323(9)  | 0.0454(11) | -0.0006(8) | -0.0027(9) | -0.0157(8) |
| C28 | 0.0291(8)  | 0.0319(8)  | 0.0451(10) | -0.0034(6) | -0.0087(7) | -0.0033(7) |

The general temperature factor expression:  $\exp(-2\pi^2(a^2U_{11}h^2 + b^2U_{22}k^2 + c^2U_{33}l^2 + 2a*b*U_{12}hk + 2a*c*U_{13}hl + 2b*c*U_{23}kl))$

#### Bond lengths (Å)

| atom | atom | distance   | atom | atom | distance   |
|------|------|------------|------|------|------------|
| Fe1  | Si1  | 2.4091(6)  | Fe1  | Si4  | 2.4260(6)  |
| Fe1  | C15  | 1.9799(14) | Fe1  | C22  | 1.9873(14) |
| Si1  | Si2  | 2.3352(5)  | Si1  | Si6  | 2.3340(6)  |
| Si1  | Si7  | 2.3446(6)  | Si2  | Si3  | 2.3377(6)  |
| Si2  | C4   | 1.8916(17) | Si2  | C5   | 1.8799(17) |
| Si3  | Si4  | 2.3404(6)  | Si3  | C6   | 1.8926(16) |
| Si3  | C7   | 1.8906(16) | Si4  | Si5  | 2.3471(6)  |
| Si4  | Si8  | 2.3434(6)  | Si5  | Si6  | 2.3417(6)  |
| Si5  | C11  | 1.8973(17) | Si5  | C12  | 1.8869(18) |
| Si6  | C13  | 1.8927(17) | Si6  | C14  | 1.8861(18) |
| Si7  | C1   | 1.8752(16) | Si7  | C2   | 1.8818(17) |
| Si7  | C3   | 1.8804(16) | Si8  | C8   | 1.8738(18) |
| Si8  | C9   | 1.8743(17) | Si8  | C10  | 1.876(2)   |
| N1   | C15  | 1.3574(17) | N1   | C16  | 1.4491(18) |
| N1   | C17  | 1.3988(19) | N2   | C15  | 1.3554(17) |
| N2   | C19  | 1.3901(19) | N2   | C21  | 1.449(2)   |
| N3   | C22  | 1.3517(17) | N3   | C23  | 1.4430(19) |
| N3   | C25  | 1.3891(18) | N4   | C22  | 1.3580(17) |
| N4   | C26  | 1.3965(19) | N4   | C28  | 1.444(2)   |
| C17  | C18  | 1.480(2)   | C17  | C19  | 1.339(2)   |
| C19  | C20  | 1.487(2)   | C24  | C25  | 1.483(2)   |

C25 C26 1.339(2) C26 C27 1.489(2)

Bond angles (°)

| atom | atom | atom | angle      | atom | atom | atom | angle       |
|------|------|------|------------|------|------|------|-------------|
| Si1  | Fe1  | Si4  | 85.994(18) | Si1  | Fe1  | C15  | 89.74(4)    |
| Si1  | Fe1  | C22  | 170.90(4)  | Si4  | Fe1  | C15  | 168.55(4)   |
| Si4  | Fe1  | C22  | 89.67(4)   | C15  | Fe1  | C22  | 95.96(6)    |
| Fe1  | Si1  | Si2  | 109.59(2)  | Fe1  | Si1  | Si6  | 101.27(2)   |
| Fe1  | Si1  | Si7  | 127.71(2)  | Si2  | Si1  | Si6  | 104.89(2)   |
| Si2  | Si1  | Si7  | 106.22(2)  | Si6  | Si1  | Si7  | 104.90(2)   |
| Si1  | Si2  | Si3  | 100.97(2)  | Si1  | Si2  | C4   | 112.05(5)   |
| Si1  | Si2  | C5   | 115.55(5)  | Si3  | Si2  | C4   | 109.17(5)   |
| Si3  | Si2  | C5   | 113.40(5)  | C4   | Si2  | C5   | 105.72(7)   |
| Si2  | Si3  | Si4  | 101.55(2)  | Si2  | Si3  | C6   | 106.17(5)   |
| Si2  | Si3  | C7   | 114.72(6)  | Si4  | Si3  | C6   | 111.61(5)   |
| Si4  | Si3  | C7   | 116.97(6)  | C6   | Si3  | C7   | 105.48(7)   |
| Fe1  | Si4  | Si3  | 103.00(2)  | Fe1  | Si4  | Si5  | 110.012(19) |
| Fe1  | Si4  | Si8  | 125.75(2)  | Si3  | Si4  | Si5  | 103.24(2)   |
| Si3  | Si4  | Si8  | 104.93(2)  | Si5  | Si4  | Si8  | 107.48(2)   |
| Si4  | Si5  | Si6  | 99.07(2)   | Si4  | Si5  | C11  | 110.74(6)   |
| Si4  | Si5  | C12  | 119.11(6)  | Si6  | Si5  | C11  | 110.54(5)   |
| Si6  | Si5  | C12  | 112.64(6)  | C11  | Si5  | C12  | 104.78(8)   |
| Si1  | Si6  | Si5  | 102.75(2)  | Si1  | Si6  | C13  | 108.27(5)   |
| Si1  | Si6  | C14  | 117.44(6)  | Si5  | Si6  | C13  | 106.42(5)   |
| Si5  | Si6  | C14  | 115.35(6)  | C13  | Si6  | C14  | 106.02(7)   |
| Si1  | Si7  | C1   | 114.71(5)  | Si1  | Si7  | C2   | 112.05(5)   |
| Si1  | Si7  | C3   | 111.39(5)  | C1   | Si7  | C2   | 105.71(7)   |
| C1   | Si7  | C3   | 105.38(7)  | C2   | Si7  | C3   | 107.04(7)   |
| Si4  | Si8  | C8   | 115.17(6)  | Si4  | Si8  | C9   | 111.50(5)   |
| Si4  | Si8  | C10  | 111.21(6)  | C8   | Si8  | C9   | 105.36(8)   |
| C8   | Si8  | C10  | 105.79(8)  | C9   | Si8  | C10  | 107.28(9)   |
| C15  | N1   | C16  | 124.07(12) | C15  | N1   | C17  | 112.05(11)  |
| C16  | N1   | C17  | 123.68(12) | C15  | N2   | C19  | 112.32(12)  |
| C15  | N2   | C21  | 122.65(12) | C19  | N2   | C21  | 125.01(12)  |
| C22  | N3   | C23  | 122.84(12) | C22  | N3   | C25  | 112.36(11)  |
| C23  | N3   | C25  | 124.67(12) | C22  | N4   | C26  | 111.85(12)  |
| C22  | N4   | C28  | 123.58(12) | C26  | N4   | C28  | 124.47(12)  |
| Fe1  | C15  | N1   | 130.06(10) | Fe1  | C15  | N2   | 126.91(10)  |

|     |     |     |            |     |     |     |            |
|-----|-----|-----|------------|-----|-----|-----|------------|
| N1  | C15 | N2  | 103.00(11) | N1  | C17 | C18 | 122.30(13) |
| N1  | C17 | C19 | 106.12(13) | C18 | C17 | C19 | 131.55(14) |
| N2  | C19 | C17 | 106.52(13) | N2  | C19 | C20 | 122.16(14) |
| C17 | C19 | C20 | 131.30(15) | Fe1 | C22 | N3  | 125.00(10) |
| Fe1 | C22 | N4  | 131.87(10) | N3  | C22 | N4  | 103.13(11) |
| N3  | C25 | C24 | 121.62(13) | N3  | C25 | C26 | 106.39(13) |
| C24 | C25 | C26 | 131.94(14) | N4  | C26 | C25 | 106.26(12) |
| N4  | C26 | C27 | 122.29(14) | C25 | C26 | C27 | 131.44(15) |

### Torsion Angles(o)

(Those having bond angles > 160 or < 20 degrees are excluded.)

| atom1 | atom2 | atom3 | atom4 | angle       | atom1 | atom2 | atom3 | atom4 | angle       |
|-------|-------|-------|-------|-------------|-------|-------|-------|-------|-------------|
| Si1   | Fe1   | Si4   | Si3   | 58.476(17)  | Si1   | Fe1   | Si4   | Si5   | -51.049(19) |
| Si1   | Fe1   | Si4   | Si8   | 177.95(2)   | Si4   | Fe1   | Si1   | Si2   | -51.023(19) |
| Si4   | Fe1   | Si1   | Si6   | 59.406(16)  | Si4   | Fe1   | Si1   | Si7   | 178.45(2)   |
| Si1   | Fe1   | C15   | N1    | -84.51(11)  | Si1   | Fe1   | C15   | N2    | 97.96(10)   |
| C15   | Fe1   | Si1   | Si2   | 118.34(4)   | C15   | Fe1   | Si1   | Si6   | -131.23(4)  |
| C15   | Fe1   | Si1   | Si7   | -12.19(4)   | Si4   | Fe1   | C22   | N3    | 93.82(10)   |
| Si4   | Fe1   | C22   | N4    | -86.46(11)  | C22   | Fe1   | Si4   | Si3   | -129.53(4)  |
| C22   | Fe1   | Si4   | Si5   | 120.94(4)   | C22   | Fe1   | Si4   | Si8   | -10.06(4)   |
| C15   | Fe1   | C22   | N3    | -76.18(10)  | C15   | Fe1   | C22   | N4    | 103.53(12)  |
| C22   | Fe1   | C15   | N1    | 102.60(11)  | C22   | Fe1   | C15   | N2    | -74.93(11)  |
| Fe1   | Si1   | Si2   | Si3   | 25.89(2)    | Fe1   | Si1   | Si2   | C4    | -90.18(3)   |
| Fe1   | Si1   | Si2   | C5    | 148.64(2)   | Fe1   | Si1   | Si6   | Si5   | -52.69(2)   |
| Fe1   | Si1   | Si6   | C13   | 59.63(2)    | Fe1   | Si1   | Si6   | C14   | 179.558(19) |
| Fe1   | Si1   | Si7   | C1    | 51.72(3)    | Fe1   | Si1   | Si7   | C2    | -68.81(3)   |
| Fe1   | Si1   | Si7   | C3    | 171.31(2)   | Si2   | Si1   | Si6   | Si5   | 61.30(2)    |
| Si2   | Si1   | Si6   | C13   | 173.63(2)   | Si2   | Si1   | Si6   | C14   | -66.45(3)   |
| Si6   | Si1   | Si2   | Si3   | -82.13(2)   | Si6   | Si1   | Si2   | C4    | 161.81(2)   |
| Si6   | Si1   | Si2   | C5    | 40.63(3)    | Si2   | Si1   | Si7   | C1    | -80.05(3)   |
| Si2   | Si1   | Si7   | C2    | 159.42(2)   | Si2   | Si1   | Si7   | C3    | 39.54(3)    |
| Si7   | Si1   | Si2   | Si3   | 167.114(18) | Si7   | Si1   | Si2   | C4    | 51.05(3)    |
| Si7   | Si1   | Si2   | C5    | -70.13(3)   | Si6   | Si1   | Si7   | C1    | 169.195(19) |
| Si6   | Si1   | Si7   | C2    | 48.66(3)    | Si6   | Si1   | Si7   | C3    | -71.22(2)   |
| Si7   | Si1   | Si6   | Si5   | 173.007(17) | Si7   | Si1   | Si6   | C13   | -74.67(3)   |
| Si7   | Si1   | Si6   | C14   | 45.26(3)    | Si1   | Si2   | Si3   | Si4   | 13.84(2)    |
| Si1   | Si2   | Si3   | C6    | -102.94(2)  | Si1   | Si2   | Si3   | C7    | 140.98(2)   |
| C4    | Si2   | Si3   | Si4   | 132.02(6)   | C4    | Si2   | Si3   | C6    | 15.23(6)    |

|     |     |     |     |             |     |     |     |     |             |
|-----|-----|-----|-----|-------------|-----|-----|-----|-----|-------------|
| C4  | Si2 | Si3 | C7  | -100.84(6)  | C5  | Si2 | Si3 | Si4 | -110.40(6)  |
| C5  | Si2 | Si3 | C6  | 132.82(6)   | C5  | Si2 | Si3 | C7  | 16.74(6)    |
| Si2 | Si3 | Si4 | Fe1 | -49.34(2)   | Si2 | Si3 | Si4 | Si5 | 65.18(2)    |
| Si2 | Si3 | Si4 | Si8 | 177.647(18) | C6  | Si3 | Si4 | Fe1 | 63.41(6)    |
| C6  | Si3 | Si4 | Si5 | 177.94(6)   | C6  | Si3 | Si4 | Si8 | -69.60(6)   |
| C7  | Si3 | Si4 | Fe1 | -175.00(6)  | C7  | Si3 | Si4 | Si5 | -60.47(6)   |
| C7  | Si3 | Si4 | Si8 | 51.99(6)    | Fe1 | Si4 | Si5 | Si6 | 23.46(2)    |
| Fe1 | Si4 | Si5 | C11 | -92.66(3)   | Fe1 | Si4 | Si5 | C12 | 145.81(2)   |
| Fe1 | Si4 | Si8 | C8  | 56.75(3)    | Fe1 | Si4 | Si8 | C9  | -63.24(3)   |
| Fe1 | Si4 | Si8 | C10 | 177.077(19) | Si3 | Si4 | Si5 | Si6 | -85.90(2)   |
| Si3 | Si4 | Si5 | C11 | 157.98(2)   | Si3 | Si4 | Si5 | C12 | 36.44(3)    |
| Si3 | Si4 | Si8 | C8  | 175.36(2)   | Si3 | Si4 | Si8 | C9  | 55.37(3)    |
| Si3 | Si4 | Si8 | C10 | -64.32(3)   | Si5 | Si4 | Si8 | C8  | -75.22(3)   |
| Si5 | Si4 | Si8 | C9  | 164.792(19) | Si5 | Si4 | Si8 | C10 | 45.10(3)    |
| Si8 | Si4 | Si5 | Si6 | 163.512(17) | Si8 | Si4 | Si5 | C11 | 47.39(3)    |
| Si8 | Si4 | Si5 | C12 | -74.14(3)   | Si4 | Si5 | Si6 | Si1 | 16.96(2)    |
| Si4 | Si5 | Si6 | C13 | -96.74(2)   | Si4 | Si5 | Si6 | C14 | 146.01(2)   |
| C11 | Si5 | Si6 | Si1 | 133.23(6)   | C11 | Si5 | Si6 | C13 | 19.54(6)    |
| C11 | Si5 | Si6 | C14 | -97.72(6)   | C12 | Si5 | Si6 | Si1 | -109.94(6)  |
| C12 | Si5 | Si6 | C13 | 136.37(6)   | C12 | Si5 | Si6 | C14 | 19.12(6)    |
| C16 | N1  | C15 | Fe1 | 7.1(2)      | C16 | N1  | C15 | N2  | -174.93(11) |
| C15 | N1  | C17 | C18 | -178.22(11) | C15 | N1  | C17 | C19 | -0.07(15)   |
| C17 | N1  | C15 | Fe1 | -177.87(10) | C17 | N1  | C15 | N2  | 0.11(14)    |
| C16 | N1  | C17 | C18 | -3.2(2)     | C16 | N1  | C17 | C19 | 174.99(11)  |
| C15 | N2  | C19 | C17 | 0.07(15)    | C15 | N2  | C19 | C20 | 178.58(11)  |
| C19 | N2  | C15 | Fe1 | 177.96(10)  | C19 | N2  | C15 | N1  | -0.11(14)   |
| C21 | N2  | C15 | Fe1 | -0.23(19)   | C21 | N2  | C15 | N1  | -178.30(11) |
| C21 | N2  | C19 | C17 | 178.21(12)  | C21 | N2  | C19 | C20 | -3.3(2)     |
| C23 | N3  | C22 | Fe1 | 4.38(19)    | C23 | N3  | C22 | N4  | -175.40(11) |
| C22 | N3  | C25 | C24 | 177.02(11)  | C22 | N3  | C25 | C26 | -0.79(15)   |
| C25 | N3  | C22 | Fe1 | -179.71(10) | C25 | N3  | C22 | N4  | 0.51(14)    |
| C23 | N3  | C25 | C24 | -7.2(2)     | C23 | N3  | C25 | C26 | 175.03(12)  |
| C22 | N4  | C26 | C25 | -0.42(15)   | C22 | N4  | C26 | C27 | -179.60(11) |
| C26 | N4  | C22 | Fe1 | -179.81(11) | C26 | N4  | C22 | N3  | -0.05(14)   |
| C28 | N4  | C22 | Fe1 | 3.7(2)      | C28 | N4  | C22 | N3  | -176.53(12) |
| C28 | N4  | C26 | C25 | 176.02(12)  | C28 | N4  | C26 | C27 | -3.2(2)     |
| N1  | C17 | C19 | N2  | -0.00(15)   | N1  | C17 | C19 | C20 | -178.32(13) |
| C18 | C17 | C19 | N2  | 177.91(14)  | C18 | C17 | C19 | C20 | -0.4(3)     |

|     |     |     |    |             |     |     |     |     |            |
|-----|-----|-----|----|-------------|-----|-----|-----|-----|------------|
| N3  | C25 | C26 | N4 | 0.70(15)    | N3  | C25 | C26 | C27 | 179.76(13) |
| C24 | C25 | C26 | N4 | -176.80(15) | C24 | C25 | C26 | C27 | 2.3(3)     |



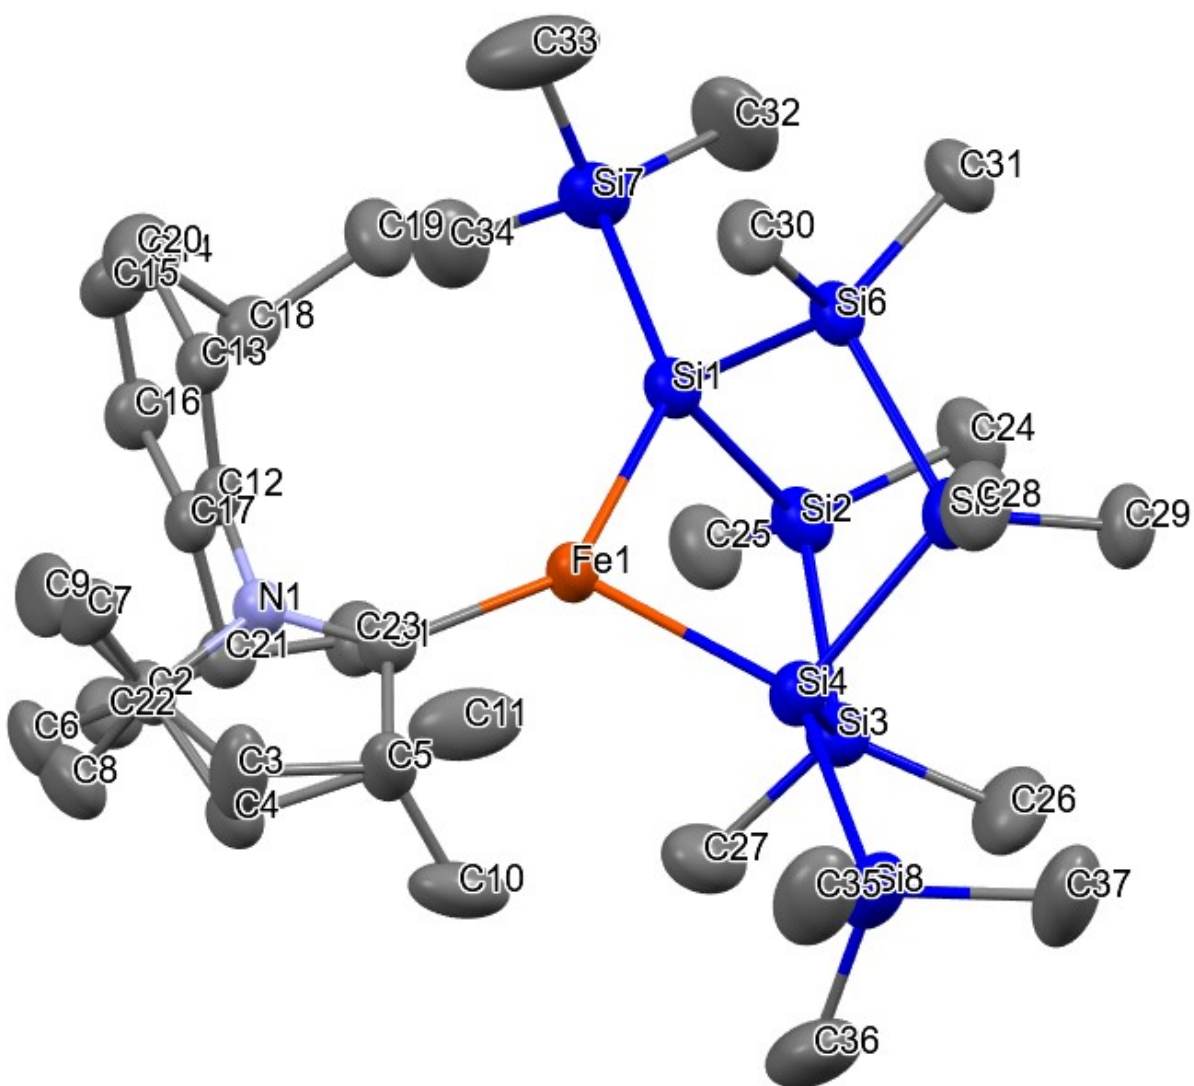

**Figure S12.** ORTEP drawing of **4** (50% probability of the thermal ellipsoids). Hydrogen atoms were omitted for clarity.

**Table S8.** Crystal data and structure refinement for **4**.

|                                      |                                                                                                               |
|--------------------------------------|---------------------------------------------------------------------------------------------------------------|
| Empirical Formula                    | C <sub>34</sub> H <sub>65</sub> FeNSig                                                                        |
| Formula Weight                       | 768.43                                                                                                        |
| Crystal Color, Habit                 | brown, platelet                                                                                               |
| Crystal Dimensions                   | 0.100 X 0.100 X 0.100 mm                                                                                      |
| Crystal System                       | monoclinic                                                                                                    |
| Lattice Type                         | Primitive                                                                                                     |
| Lattice Parameters                   | a = 9.4785(7) Å<br>b = 23.6413(17) Å<br>c = 21.2483(16) Å<br>β = 102.331(7) °<br>V = 4651.6(6) Å <sup>3</sup> |
| Space Group                          | P2 <sub>1</sub> /n (#14)                                                                                      |
| Z value                              | 4                                                                                                             |
| D <sub>calc</sub>                    | 1.097 g/cm <sup>3</sup>                                                                                       |
| F <sub>000</sub>                     | 1656.00                                                                                                       |
| Diffractometer                       | R-Axis IV                                                                                                     |
| unknown Radiation (λ = 0.41220Å)     | monochromated                                                                                                 |
| Voltage, Current                     | 8kV, 100mA                                                                                                    |
| Temperature                          | -173.0°C                                                                                                      |
| Detector Aperture                    | 300.0 x 300.0 mm                                                                                              |
| Data Images                          | 720 exposures                                                                                                 |
| ω oscillation Range (χ=45.0, φ=0.0)  | 0.0 - 180.0°                                                                                                  |
| Exposure Rate                        | 240.0 sec./°                                                                                                  |
| ω oscillation Range (χ=45.0, φ=90.0) | 0.0 - 180.0°                                                                                                  |
| Exposure Rate                        | 240.0 sec./°                                                                                                  |
| Detector Position                    | 130.00 mm                                                                                                     |
| Pixel Size                           | 0.172 mm                                                                                                      |
| 2θ <sub>max</sub>                    | 31.1°                                                                                                         |
| No. of Reflections Measured          | Total: 68058<br>Unique: 10527 (R <sub>int</sub> = 0.0400)                                                     |
| Corrections                          | Lorentz-polarization<br>Absorption<br>(trans. factors: 0.785 - 1.000)                                         |
| Structure Solution                   | Direct Methods (SHELXT Version 2014/5)                                                                        |
| Refinement                           | Full-matrix least-squares on F <sup>2</sup>                                                                   |
| Function Minimized                   | Σ w (F <sub>o</sub> <sup>2</sup> - F <sub>c</sub> <sup>2</sup> ) <sup>2</sup>                                 |

|                                       |                                                                          |
|---------------------------------------|--------------------------------------------------------------------------|
| Least Squares Weights                 | $\omega = 1 / [ \sigma^2(F_o^2) + (0.0448 \cdot P)^2 + 1.2928 \cdot P ]$ |
|                                       | where $P = (\text{Max}(F_o^2, 0) + 2F_c^2) / 3$                          |
| $2\theta_{\text{max}}$ cutoff         | 31.0°                                                                    |
| Anomalous Dispersion                  | All non-hydrogen atoms                                                   |
| No. Observations (All reflections)    | 10527                                                                    |
| No. Variables                         | 444                                                                      |
| Reflection/Parameter Ratio            | 23.71                                                                    |
| Residuals: R1 ( $I > 2.00\sigma(I)$ ) | 0.0292                                                                   |
| Residuals: R (All reflections)        | 0.0346                                                                   |
| Residuals: wR2 (All reflections)      | 0.0795                                                                   |
| Goodness of Fit Indicator             | 1.034                                                                    |
| Max Shift/Error in Final Cycle        | 0.002                                                                    |
| Maximum peak in Final Diff. Map       | 0.56 e <sup>-</sup> /Å <sup>3</sup>                                      |
| Minimum peak in Final Diff. Map       | -0.22 e <sup>-</sup> /Å <sup>3</sup>                                     |

Atomic coordinates and  $B_{\text{iso}}/B_{\text{eq}}$ 

| atom | x           | y           | z           | $B_{\text{eq}}$ | occ |
|------|-------------|-------------|-------------|-----------------|-----|
| Fe1  | 0.56151(2)  | 0.73347(2)  | 0.35505(2)  | 1.397(4)        | 1   |
| Si1  | 0.64413(4)  | 0.72167(2)  | 0.25225(2)  | 1.384(6)        | 1   |
| Si2  | 0.84639(4)  | 0.78173(2)  | 0.27045(2)  | 1.535(6)        | 1   |
| Si3  | 0.81792(4)  | 0.84419(2)  | 0.35239(2)  | 1.708(6)        | 1   |
| Si4  | 0.57207(4)  | 0.83956(2)  | 0.35279(2)  | 1.596(6)        | 1   |
| Si5  | 0.45870(4)  | 0.86165(2)  | 0.24674(2)  | 1.563(6)        | 1   |
| Si6  | 0.46239(4)  | 0.77703(2)  | 0.18949(2)  | 1.463(6)        | 1   |
| Si7  | 0.69629(5)  | 0.64724(2)  | 0.18840(2)  | 1.923(7)        | 1   |
| Si8  | 0.52484(5)  | 0.91336(2)  | 0.41912(2)  | 2.305(8)        | 1   |
| N1   | 0.51512(12) | 0.63434(5)  | 0.44402(5)  | 1.281(17)       | 1   |
| C1   | 0.50994(14) | 0.68809(6)  | 0.43012(6)  | 1.384(19)       | 1   |
| C2   | 0.46852(15) | 0.61751(6)  | 0.50617(6)  | 1.59(2)         | 1   |
| C3   | 0.3936(6)   | 0.67243(15) | 0.5210(2)   | 2.65(6)         | 1/2 |
| C4   | 0.4680(4)   | 0.67551(14) | 0.53828(15) | 1.56(5)         | 1/2 |
| C5   | 0.45385(18) | 0.71952(6)  | 0.48212(7)  | 1.90(2)         | 1   |
| C6   | 0.5854(6)   | 0.57844(19) | 0.5476(3)   | 2.02(7)         | 1/2 |
| C7   | 0.3280(7)   | 0.5884(2)   | 0.4916(3)   | 2.04(8)         | 1/2 |
| C8   | 0.5941(7)   | 0.6005(2)   | 0.5568(3)   | 2.39(8)         | 1/2 |
| C9   | 0.3539(7)   | 0.5680(2)   | 0.4933(3)   | 2.40(9)         | 1/2 |
| C10  | 0.56222(18) | 0.76365(8)  | 0.51350(8)  | 2.67(3)         | 1   |
| C11  | 0.31258(17) | 0.74819(9)  | 0.45149(9)  | 2.96(3)         | 1   |
| C12  | 0.56183(14) | 0.59076(5)  | 0.40491(6)  | 1.289(19)       | 1   |
| C13  | 0.45833(14) | 0.56383(5)  | 0.35741(6)  | 1.396(19)       | 1   |
| C14  | 0.50444(15) | 0.51841(6)  | 0.32506(7)  | 1.72(2)         | 1   |
| C15  | 0.64620(16) | 0.50097(6)  | 0.33878(7)  | 1.81(2)         | 1   |
| C16  | 0.74767(15) | 0.52995(6)  | 0.38371(7)  | 1.70(2)         | 1   |
| C17  | 0.70859(14) | 0.57589(5)  | 0.41729(6)  | 1.385(19)       | 1   |
| C18  | 0.30375(14) | 0.58389(6)  | 0.33654(7)  | 1.61(2)         | 1   |
| C19  | 0.28313(17) | 0.61155(7)  | 0.27012(7)  | 2.23(2)         | 1   |
| C20  | 0.19403(16) | 0.53630(7)  | 0.33458(8)  | 2.12(2)         | 1   |
| C21  | 0.82478(14) | 0.60992(6)  | 0.46116(6)  | 1.54(2)         | 1   |
| C22  | 0.93120(16) | 0.57306(6)  | 0.50793(7)  | 2.05(2)         | 1   |
| C23  | 0.90627(15) | 0.64577(6)  | 0.42085(7)  | 1.93(2)         | 1   |
| C24  | 0.87219(16) | 0.82155(7)  | 0.19661(7)  | 2.19(2)         | 1   |
| C25  | 1.01876(15) | 0.74043(7)  | 0.29806(8)  | 2.14(2)         | 1   |

|     |             |             |             |         |   |
|-----|-------------|-------------|-------------|---------|---|
| C26 | 0.89291(19) | 0.91665(7)  | 0.34144(9)  | 2.81(3) | 1 |
| C27 | 0.92646(19) | 0.81611(8)  | 0.43130(8)  | 2.67(3) | 1 |
| C28 | 0.26593(16) | 0.88370(7)  | 0.24403(8)  | 2.32(3) | 1 |
| C29 | 0.54587(16) | 0.92039(6)  | 0.20830(8)  | 2.08(2) | 1 |
| C30 | 0.28019(15) | 0.74304(6)  | 0.18409(7)  | 1.97(2) | 1 |
| C31 | 0.47899(17) | 0.78860(7)  | 0.10331(7)  | 2.17(2) | 1 |
| C32 | 0.7844(2)   | 0.67450(9)  | 0.12311(9)  | 3.45(4) | 1 |
| C33 | 0.5334(2)   | 0.60610(10) | 0.14874(11) | 4.25(5) | 1 |
| C34 | 0.8281(2)   | 0.59718(7)  | 0.23723(9)  | 2.87(3) | 1 |
| C35 | 0.3438(2)   | 0.90778(8)  | 0.44063(10) | 3.26(3) | 1 |
| C36 | 0.6652(2)   | 0.91792(8)  | 0.49581(9)  | 3.56(4) | 1 |
| C37 | 0.5308(3)   | 0.98254(7)  | 0.37642(10) | 3.61(4) | 1 |

$$B_{\text{eq}} = 8/3 \pi^2 (U_{11}(\text{aa}^*)^2 + U_{22}(\text{bb}^*)^2 + U_{33}(\text{cc}^*)^2 + 2U_{12}(\text{aa}^*\text{bb}^*)\cos \gamma + 2U_{13}(\text{aa}^*\text{cc}^*)\cos \beta + 2U_{23}(\text{bb}^*\text{cc}^*)\cos \alpha)$$

#### Anisotropic displacement parameters

| atom | U <sub>11</sub> | U <sub>22</sub> | U <sub>33</sub> | U <sub>12</sub> | U <sub>13</sub> | U <sub>23</sub> |
|------|-----------------|-----------------|-----------------|-----------------|-----------------|-----------------|
| Fe1  | 0.02288(10)     | 0.01520(10)     | 0.01680(10)     | 0.00170(7)      | 0.00823(7)      | 0.00118(7)      |
| Si1  | 0.01786(17)     | 0.01889(17)     | 0.01683(17)     | 0.00215(13)     | 0.00592(13)     | 0.00160(13)     |
| Si2  | 0.01654(17)     | 0.02464(19)     | 0.01860(17)     | 0.00069(14)     | 0.00702(13)     | 0.00319(14)     |
| Si3  | 0.02153(18)     | 0.02160(19)     | 0.02172(18)     | -0.00106(14)    | 0.00452(14)     | 0.00028(14)     |
| Si4  | 0.02430(19)     | 0.01725(18)     | 0.02138(18)     | 0.00063(14)     | 0.00997(14)     | 0.00029(13)     |
| Si5  | 0.01801(17)     | 0.01784(18)     | 0.02484(19)     | 0.00108(13)     | 0.00750(14)     | 0.00411(14)     |
| Si6  | 0.01799(17)     | 0.01989(18)     | 0.01786(17)     | 0.00052(13)     | 0.00417(13)     | 0.00414(13)     |
| Si7  | 0.0282(2)       | 0.0260(2)       | 0.02122(18)     | 0.00363(16)     | 0.01052(15)     | -0.00211(15)    |
| Si8  | 0.0418(2)       | 0.01813(19)     | 0.0328(2)       | -0.00004(17)    | 0.01949(19)     | -0.00299(16)    |
| N1   | 0.0189(5)       | 0.0155(5)       | 0.0159(5)       | 0.0009(4)       | 0.0072(4)       | 0.0006(4)       |
| C1   | 0.0199(6)       | 0.0165(6)       | 0.0170(6)       | 0.0018(5)       | 0.0060(5)       | -0.0010(5)      |
| C2   | 0.0280(7)       | 0.0186(6)       | 0.0165(6)       | 0.0006(5)       | 0.0111(5)       | 0.0032(5)       |
| C3   | 0.052(2)        | 0.0204(16)      | 0.038(2)        | 0.0075(18)      | 0.031(2)        | 0.0063(14)      |
| C4   | 0.0229(15)      | 0.0211(14)      | 0.0165(14)      | 0.0004(13)      | 0.0069(12)      | 0.0022(10)      |
| C5   | 0.0392(8)       | 0.0167(6)       | 0.0208(7)       | 0.0050(6)       | 0.0165(6)       | 0.0007(5)       |
| C6   | 0.0316(19)      | 0.026(2)        | 0.020(2)        | 0.002(2)        | 0.0068(14)      | 0.0100(18)      |
| C7   | 0.037(3)        | 0.021(2)        | 0.0240(18)      | -0.010(2)       | 0.0155(17)      | -0.002(2)       |
| C8   | 0.038(2)        | 0.035(3)        | 0.0190(19)      | -0.002(2)       | 0.0076(15)      | 0.007(2)        |
| C9   | 0.033(3)        | 0.029(3)        | 0.032(2)        | -0.013(2)       | 0.0128(17)      | 0.007(2)        |
| C10  | 0.0325(8)       | 0.0444(10)      | 0.0215(7)       | 0.0080(7)       | -0.0007(6)      | -0.0127(7)      |
| C11  | 0.0217(7)       | 0.0502(11)      | 0.0416(9)       | 0.0034(7)       | 0.0094(7)       | -0.0209(8)      |
| C12  | 0.0207(6)       | 0.0122(6)       | 0.0179(6)       | 0.0013(5)       | 0.0084(5)       | 0.0015(5)       |

|     |            |            |            |            |            |             |
|-----|------------|------------|------------|------------|------------|-------------|
| C13 | 0.0200(6)  | 0.0150(6)  | 0.0188(6)  | -0.0003(5) | 0.0059(5)  | 0.0017(5)   |
| C14 | 0.0259(7)  | 0.0178(6)  | 0.0228(6)  | -0.0020(5) | 0.0079(5)  | -0.0025(5)  |
| C15 | 0.0287(7)  | 0.0174(6)  | 0.0253(7)  | 0.0024(5)  | 0.0119(6)  | -0.0047(5)  |
| C16 | 0.0216(6)  | 0.0195(6)  | 0.0256(7)  | 0.0037(5)  | 0.0101(5)  | 0.0003(5)   |
| C17 | 0.0203(6)  | 0.0156(6)  | 0.0180(6)  | -0.0002(5) | 0.0069(5)  | 0.0023(5)   |
| C18 | 0.0196(6)  | 0.0189(6)  | 0.0220(6)  | 0.0004(5)  | 0.0031(5)  | -0.0012(5)  |
| C19 | 0.0270(7)  | 0.0296(8)  | 0.0271(7)  | 0.0012(6)  | 0.0030(6)  | 0.0059(6)   |
| C20 | 0.0221(7)  | 0.0257(7)  | 0.0320(8)  | -0.0025(6) | 0.0043(6)  | 0.0006(6)   |
| C21 | 0.0193(6)  | 0.0180(6)  | 0.0213(6)  | 0.0014(5)  | 0.0043(5)  | 0.0002(5)   |
| C22 | 0.0252(7)  | 0.0255(7)  | 0.0251(7)  | 0.0032(6)  | 0.0008(6)  | 0.0027(6)   |
| C23 | 0.0213(6)  | 0.0237(7)  | 0.0287(7)  | -0.0027(5) | 0.0061(5)  | 0.0034(6)   |
| C24 | 0.0248(7)  | 0.0354(8)  | 0.0255(7)  | 0.0000(6)  | 0.0107(6)  | 0.0084(6)   |
| C25 | 0.0189(6)  | 0.0340(8)  | 0.0303(8)  | 0.0028(6)  | 0.0094(6)  | 0.0067(6)   |
| C26 | 0.0312(8)  | 0.0283(8)  | 0.0467(10) | -0.0089(6) | 0.0072(7)  | 0.0004(7)   |
| C27 | 0.0379(9)  | 0.0353(9)  | 0.0251(7)  | 0.0069(7)  | -0.0006(6) | -0.0025(6)  |
| C28 | 0.0221(7)  | 0.0277(8)  | 0.0403(9)  | 0.0044(6)  | 0.0109(6)  | 0.0056(6)   |
| C29 | 0.0262(7)  | 0.0215(7)  | 0.0333(8)  | 0.0009(6)  | 0.0111(6)  | 0.0072(6)   |
| C30 | 0.0203(6)  | 0.0262(7)  | 0.0270(7)  | -0.0012(5) | 0.0024(5)  | 0.0050(6)   |
| C31 | 0.0291(7)  | 0.0340(8)  | 0.0195(7)  | -0.0001(6) | 0.0052(6)  | 0.0061(6)   |
| C32 | 0.0625(12) | 0.0467(11) | 0.0307(9)  | 0.0104(9)  | 0.0299(8)  | 0.0037(8)   |
| C33 | 0.0428(10) | 0.0608(14) | 0.0587(13) | -0.0073(9) | 0.0127(9)  | -0.0363(11) |
| C34 | 0.0478(10) | 0.0287(8)  | 0.0358(9)  | 0.0153(7)  | 0.0163(7)  | 0.0022(7)   |
| C35 | 0.0504(11) | 0.0297(9)  | 0.0526(11) | 0.0060(8)  | 0.0312(9)  | -0.0037(8)  |
| C36 | 0.0629(13) | 0.0336(9)  | 0.0395(10) | -0.0092(9) | 0.0123(9)  | -0.0168(8)  |
| C37 | 0.0736(14) | 0.0200(8)  | 0.0529(11) | 0.0024(8)  | 0.0344(10) | 0.0017(7)   |

The general temperature factor expression:  $\exp(-2\pi^2(a^*U_{11}h^2 + b^*U_{22}k^2 + c^*U_{33}l^2 + 2a^*b^*U_{12}hk + 2a^*c^*U_{13}hl + 2b^*c^*U_{23}kl))$

#### Bond lengths (Å)

| atom | atom | distance   | atom | atom | distance   |
|------|------|------------|------|------|------------|
| Fe1  | Si1  | 2.4886(6)  | Fe1  | Si4  | 2.5110(7)  |
| Fe1  | C1   | 2.0658(15) | Si1  | Si2  | 2.3504(6)  |
| Si1  | Si6  | 2.3404(6)  | Si1  | Si7  | 2.3383(7)  |
| Si2  | Si3  | 2.3421(7)  | Si2  | C24  | 1.8899(17) |
| Si2  | C25  | 1.8861(15) | Si3  | Si4  | 2.3347(6)  |
| Si3  | C26  | 1.8880(18) | Si3  | C27  | 1.8904(17) |
| Si4  | Si5  | 2.3390(6)  | Si4  | Si8  | 2.3453(7)  |

|     |     |            |     |     |            |
|-----|-----|------------|-----|-----|------------|
| Si5 | Si6 | 2.3455(7)  | Si5 | C28 | 1.8891(16) |
| Si5 | C29 | 1.8885(17) | Si6 | C30 | 1.8859(15) |
| Si6 | C31 | 1.8910(16) | Si7 | C32 | 1.879(2)   |
| Si7 | C33 | 1.866(2)   | Si7 | C34 | 1.8668(18) |
| Si8 | C35 | 1.872(2)   | Si8 | C36 | 1.8737(19) |
| Si8 | C37 | 1.8770(19) | N1  | C1  | 1.3031(18) |
| N1  | C2  | 1.5318(18) | N1  | C12 | 1.4510(18) |
| C1  | C5  | 1.519(2)   | C2  | C3  | 1.544(4)   |
| C2  | C4  | 1.532(4)   | C2  | C6  | 1.562(5)   |
| C2  | C7  | 1.472(6)   | C2  | C8  | 1.480(5)   |
| C2  | C9  | 1.580(6)   | C3  | C4  | 0.726(6)   |
| C3  | C5  | 1.564(5)   | C4  | C5  | 1.567(4)   |
| C5  | C10 | 1.515(2)   | C5  | C11 | 1.518(2)   |
| C6  | C8  | 0.558(7)   | C7  | C9  | 0.537(7)   |
| C12 | C13 | 1.4013(16) | C12 | C17 | 1.4041(18) |
| C13 | C14 | 1.395(2)   | C13 | C18 | 1.5135(18) |
| C14 | C15 | 1.376(2)   | C15 | C16 | 1.3834(19) |
| C16 | C17 | 1.392(2)   | C17 | C21 | 1.5135(17) |
| C18 | C19 | 1.530(2)   | C18 | C20 | 1.527(2)   |
| C21 | C22 | 1.5285(18) | C21 | C23 | 1.527(2)   |

#### Bond angles (°)

| atom | atom | atom | angle     | atom | atom | atom | angle     |
|------|------|------|-----------|------|------|------|-----------|
| Si1  | Fe1  | Si4  | 94.24(2)  | Si1  | Fe1  | C1   | 142.21(5) |
| Si4  | Fe1  | C1   | 123.40(4) | Fe1  | Si1  | Si2  | 100.74(2) |
| Fe1  | Si1  | Si6  | 96.09(2)  | Fe1  | Si1  | Si7  | 137.63(3) |
| Si2  | Si1  | Si6  | 103.37(2) | Si2  | Si1  | Si7  | 106.50(2) |
| Si6  | Si1  | Si7  | 108.14(2) | Si1  | Si2  | Si3  | 106.49(2) |
| Si1  | Si2  | C24  | 114.20(5) | Si1  | Si2  | C25  | 111.12(5) |
| Si3  | Si2  | C24  | 111.04(6) | Si3  | Si2  | C25  | 108.95(5) |
| C24  | Si2  | C25  | 105.01(7) | Si2  | Si3  | Si4  | 104.28(2) |
| Si2  | Si3  | C26  | 111.98(7) | Si2  | Si3  | C27  | 108.10(6) |
| Si4  | Si3  | C26  | 116.44(6) | Si4  | Si3  | C27  | 109.56(6) |
| C26  | Si3  | C27  | 106.26(8) | Fe1  | Si4  | Si3  | 95.21(2)  |
| Fe1  | Si4  | Si5  | 103.26(2) | Fe1  | Si4  | Si8  | 135.90(2) |
| Si3  | Si4  | Si5  | 103.86(2) | Si3  | Si4  | Si8  | 106.62(2) |
| Si5  | Si4  | Si8  | 107.79(2) | Si4  | Si5  | Si6  | 104.75(2) |
| Si4  | Si5  | C28  | 109.47(6) | Si4  | Si5  | C29  | 115.30(5) |

|     |     |     |            |     |     |     |            |
|-----|-----|-----|------------|-----|-----|-----|------------|
| Si6 | Si5 | C28 | 109.94(5)  | Si6 | Si5 | C29 | 110.27(6)  |
| C28 | Si5 | C29 | 107.07(7)  | Si1 | Si6 | Si5 | 105.79(2)  |
| Si1 | Si6 | C30 | 110.45(5)  | Si1 | Si6 | C31 | 115.42(5)  |
| Si5 | Si6 | C30 | 106.27(5)  | Si5 | Si6 | C31 | 113.10(6)  |
| C30 | Si6 | C31 | 105.50(7)  | Si1 | Si7 | C32 | 110.64(7)  |
| Si1 | Si7 | C33 | 113.40(8)  | Si1 | Si7 | C34 | 110.73(6)  |
| C32 | Si7 | C33 | 107.48(10) | C32 | Si7 | C34 | 106.12(10) |
| C33 | Si7 | C34 | 108.15(9)  | Si4 | Si8 | C35 | 113.38(6)  |
| Si4 | Si8 | C36 | 111.98(7)  | Si4 | Si8 | C37 | 109.17(7)  |
| C35 | Si8 | C36 | 108.01(10) | C35 | Si8 | C37 | 107.64(10) |
| C36 | Si8 | C37 | 106.33(9)  | C1  | N1  | C2  | 116.41(12) |
| C1  | N1  | C12 | 124.33(12) | C2  | N1  | C12 | 119.26(11) |
| Fe1 | C1  | N1  | 132.67(11) | Fe1 | C1  | C5  | 119.01(10) |
| N1  | C1  | C5  | 108.32(12) | N1  | C2  | C3  | 100.8(2)   |
| N1  | C2  | C4  | 100.40(16) | N1  | C2  | C6  | 109.9(2)   |
| N1  | C2  | C7  | 110.8(3)   | N1  | C2  | C8  | 111.2(3)   |
| N1  | C2  | C9  | 110.9(3)   | C3  | C2  | C4  | 27.3(2)    |
| C3  | C2  | C6  | 133.2(3)   | C3  | C2  | C7  | 90.1(3)    |
| C3  | C2  | C8  | 114.4(3)   | C3  | C2  | C9  | 109.2(3)   |
| C4  | C2  | C6  | 110.3(2)   | C4  | C2  | C7  | 115.0(3)   |
| C4  | C2  | C8  | 89.9(2)    | C4  | C2  | C9  | 132.2(3)   |
| C6  | C2  | C7  | 110.0(3)   | C6  | C2  | C8  | 20.9(3)    |
| C6  | C2  | C9  | 92.2(3)    | C7  | C2  | C8  | 125.2(3)   |
| C7  | C2  | C9  | 19.9(3)    | C8  | C2  | C9  | 110.0(3)   |
| C2  | C3  | C4  | 75.4(4)    | C2  | C3  | C5  | 104.8(3)   |
| C4  | C3  | C5  | 76.8(5)    | C2  | C4  | C3  | 77.3(4)    |
| C2  | C4  | C5  | 105.2(2)   | C3  | C4  | C5  | 76.4(4)    |
| C1  | C5  | C3  | 105.04(19) | C1  | C5  | C4  | 104.06(16) |
| C1  | C5  | C10 | 110.32(14) | C1  | C5  | C11 | 108.68(12) |
| C3  | C5  | C4  | 26.8(2)    | C3  | C5  | C10 | 123.19(19) |
| C3  | C5  | C11 | 99.0(2)    | C4  | C5  | C10 | 100.51(16) |
| C4  | C5  | C11 | 123.2(2)   | C10 | C5  | C11 | 109.53(13) |
| C2  | C6  | C8  | 71.2(7)    | C2  | C7  | C9  | 91.5(10)   |
| C2  | C8  | C6  | 87.9(8)    | C2  | C9  | C7  | 68.7(9)    |
| N1  | C12 | C13 | 118.87(11) | N1  | C12 | C17 | 118.80(10) |
| C13 | C12 | C17 | 122.30(12) | C12 | C13 | C14 | 117.38(12) |
| C12 | C13 | C18 | 123.62(12) | C14 | C13 | C18 | 118.85(11) |
| C13 | C14 | C15 | 121.40(12) | C14 | C15 | C16 | 120.09(14) |



|     |     |     |            |     |     |     |            |
|-----|-----|-----|------------|-----|-----|-----|------------|
| C15 | C16 | C17 | 121.21(13) | C12 | C17 | C16 | 117.43(11) |
| C12 | C17 | C21 | 122.94(11) | C16 | C17 | C21 | 119.47(12) |
| C13 | C18 | C19 | 109.22(12) | C13 | C18 | C20 | 112.85(11) |
| C19 | C18 | C20 | 109.74(11) | C17 | C21 | C22 | 112.94(11) |
| C17 | C21 | C23 | 109.77(11) | C22 | C21 | C23 | 109.79(11) |

#### Torsion Angles(°)

(Those having bond angles > 160 or < 20 degrees are excluded.)

| atom1 | atom2 | atom3 | atom4 | angle        | atom1 | atom2 | atom3 | atom4 | angle      |
|-------|-------|-------|-------|--------------|-------|-------|-------|-------|------------|
| Si1   | Fe1   | Si4   | Si3   | -59.365(16)  | Si1   | Fe1   | Si4   | Si5   | 46.220(17) |
| Si1   | Fe1   | Si4   | Si8   | -179.82(2)   | Si4   | Fe1   | Si1   | Si2   | 48.558(17) |
| Si4   | Fe1   | Si1   | Si6   | -56.327(16)  | Si4   | Fe1   | Si1   | Si7   | 178.11(2)  |
| Si1   | Fe1   | C1    | N1    | 3.61(15)     | Si1   | Fe1   | C1    | C5    | -176.40(3) |
| C1    | Fe1   | Si1   | Si2   | -126.56(6)   | C1    | Fe1   | Si1   | Si6   | 128.56(6)  |
| C1    | Fe1   | Si1   | Si7   | 3.00(7)      | Si4   | Fe1   | C1    | N1    | -170.55(8) |
| Si4   | Fe1   | C1    | C5    | 9.43(9)      | C1    | Fe1   | Si4   | Si3   | 117.05(4)  |
| C1    | Fe1   | Si4   | Si5   | -137.36(4)   | C1    | Fe1   | Si4   | Si8   | -3.40(5)   |
| Fe1   | Si1   | Si2   | Si3   | -20.25(2)    | Fe1   | Si1   | Si2   | C24   | -143.17(2) |
| Fe1   | Si1   | Si2   | C25   | 98.28(2)     | Fe1   | Si1   | Si6   | Si5   | 49.45(2)   |
| Fe1   | Si1   | Si6   | C30   | -65.14(3)    | Fe1   | Si1   | Si6   | C31   | 175.32(2)  |
| Fe1   | Si1   | Si7   | C32   | -170.35(2)   | Fe1   | Si1   | Si7   | C33   | 68.80(3)   |
| Fe1   | Si1   | Si7   | C34   | -52.98(4)    | Si2   | Si1   | Si6   | Si5   | -53.15(3)  |
| Si2   | Si1   | Si6   | C30   | -167.73(2)   | Si2   | Si1   | Si6   | C31   | 72.73(3)   |
| Si6   | Si1   | Si2   | Si3   | 78.74(2)     | Si6   | Si1   | Si2   | C24   | -44.18(3)  |
| Si6   | Si1   | Si2   | C25   | -162.74(2)   | Si2   | Si1   | Si7   | C32   | -42.54(3)  |
| Si2   | Si1   | Si7   | C33   | -163.39(2)   | Si2   | Si1   | Si7   | C34   | 74.83(3)   |
| Si7   | Si1   | Si2   | Si3   | -167.430(19) | Si7   | Si1   | Si2   | C24   | 69.65(3)   |
| Si7   | Si1   | Si2   | C25   | -48.91(3)    | Si6   | Si1   | Si7   | C32   | 67.99(3)   |
| Si6   | Si1   | Si7   | C33   | -52.85(3)    | Si6   | Si1   | Si7   | C34   | -174.64(2) |
| Si7   | Si1   | Si6   | Si5   | -165.79(2)   | Si7   | Si1   | Si6   | C30   | 79.62(3)   |
| Si7   | Si1   | Si6   | C31   | -39.92(3)    | Si1   | Si2   | Si3   | Si4   | -19.23(3)  |
| Si1   | Si2   | Si3   | C26   | -145.98(2)   | Si1   | Si2   | Si3   | C27   | 97.31(2)   |
| C24   | Si2   | Si3   | Si4   | 105.65(5)    | C24   | Si2   | Si3   | C26   | -21.09(5)  |
| C24   | Si2   | Si3   | C27   | -137.81(5)   | C25   | Si2   | Si3   | Si4   | -139.16(6) |
| C25   | Si2   | Si3   | C26   | 94.09(6)     | C25   | Si2   | Si3   | C27   | -22.63(6)  |
| Si2   | Si3   | Si4   | Fe1   | 49.52(2)     | Si2   | Si3   | Si4   | Si5   | -55.54(3)  |
| Si2   | Si3   | Si4   | Si8   | -169.247(19) | C26   | Si3   | Si4   | Fe1   | 173.43(7)  |
| C26   | Si3   | Si4   | Si5   | 68.37(7)     | C26   | Si3   | Si4   | Si8   | -45.33(7)  |

|     |     |     |     |             |     |     |     |     |             |
|-----|-----|-----|-----|-------------|-----|-----|-----|-----|-------------|
| C27 | Si3 | Si4 | Fe1 | -65.99(6)   | C27 | Si3 | Si4 | Si5 | -171.05(6)  |
| C27 | Si3 | Si4 | Si8 | 75.24(7)    | Fe1 | Si4 | Si5 | Si6 | -17.96(2)   |
| Fe1 | Si4 | Si5 | C28 | 99.88(2)    | Fe1 | Si4 | Si5 | C29 | -139.35(2)  |
| Fe1 | Si4 | Si8 | C35 | -50.96(4)   | Fe1 | Si4 | Si8 | C36 | 71.56(4)    |
| Fe1 | Si4 | Si8 | C37 | -170.96(2)  | Si3 | Si4 | Si5 | Si6 | 80.91(2)    |
| Si3 | Si4 | Si5 | C28 | -161.24(2)  | Si3 | Si4 | Si5 | C29 | -40.48(3)   |
| Si3 | Si4 | Si8 | C35 | -167.34(2)  | Si3 | Si4 | Si8 | C36 | -44.81(3)   |
| Si3 | Si4 | Si8 | C37 | 72.67(3)    | Si5 | Si4 | Si8 | C35 | 81.67(3)    |
| Si5 | Si4 | Si8 | C36 | -155.81(2)  | Si5 | Si4 | Si8 | C37 | -38.33(3)   |
| Si8 | Si4 | Si5 | Si6 | -166.22(2)  | Si8 | Si4 | Si5 | C28 | -48.38(3)   |
| Si8 | Si4 | Si5 | C29 | 72.39(3)    | Si4 | Si5 | Si6 | Si1 | -20.10(3)   |
| Si4 | Si5 | Si6 | C30 | 97.33(2)    | Si4 | Si5 | Si6 | C31 | -147.38(2)  |
| C28 | Si5 | Si6 | Si1 | -137.63(6)  | C28 | Si5 | Si6 | C30 | -20.19(6)   |
| C28 | Si5 | Si6 | C31 | 95.09(6)    | C29 | Si5 | Si6 | Si1 | 104.54(5)   |
| C29 | Si5 | Si6 | C30 | -138.03(5)  | C29 | Si5 | Si6 | C31 | -22.74(5)   |
| C1  | N1  | C2  | C3  | 14.01(13)   | C1  | N1  | C2  | C4  | -13.76(13)  |
| C1  | N1  | C2  | C6  | -129.98(11) | C1  | N1  | C2  | C7  | 108.26(12)  |
| C1  | N1  | C2  | C8  | -107.69(12) | C1  | N1  | C2  | C9  | 129.55(11)  |
| C2  | N1  | C1  | Fe1 | 179.05(9)   | C2  | N1  | C1  | C5  | -0.93(13)   |
| C1  | N1  | C12 | C13 | -91.65(15)  | C1  | N1  | C12 | C17 | 90.22(14)   |
| C12 | N1  | C1  | Fe1 | -0.76(19)   | C12 | N1  | C1  | C5  | 179.25(9)   |
| C2  | N1  | C12 | C13 | 88.54(12)   | C2  | N1  | C12 | C17 | -89.59(13)  |
| C12 | N1  | C2  | C3  | -166.16(9)  | C12 | N1  | C2  | C4  | 166.07(9)   |
| C12 | N1  | C2  | C6  | 49.85(13)   | C12 | N1  | C2  | C7  | -71.91(13)  |
| C12 | N1  | C2  | C8  | 72.13(13)   | C12 | N1  | C2  | C9  | -50.63(13)  |
| Fe1 | C1  | C5  | C3  | 167.39(7)   | Fe1 | C1  | C5  | C4  | -164.92(7)  |
| Fe1 | C1  | C5  | C10 | -57.86(12)  | Fe1 | C1  | C5  | C11 | 62.24(13)   |
| N1  | C1  | C5  | C3  | -12.62(13)  | N1  | C1  | C5  | C4  | 15.07(13)   |
| N1  | C1  | C5  | C10 | 122.12(11)  | N1  | C1  | C5  | C11 | -117.77(11) |
| N1  | C2  | C3  | C4  | -91.9(3)    | N1  | C2  | C3  | C5  | -20.1(2)    |
| N1  | C2  | C4  | C3  | 93.3(3)     | N1  | C2  | C4  | C5  | 21.5(2)     |
| N1  | C2  | C6  | C8  | 97.6(6)     | N1  | C2  | C7  | C9  | 94.1(7)     |
| N1  | C2  | C8  | C6  | -90.3(7)    | N1  | C2  | C9  | C7  | -93.5(7)    |
| C3  | C2  | C4  | C3  | 0.0(4)      | C3  | C2  | C4  | C5  | -71.8(4)    |
| C4  | C2  | C3  | C4  | 0.0(3)      | C4  | C2  | C3  | C5  | 71.8(5)     |
| C3  | C2  | C6  | C8  | -30.0(8)    | C6  | C2  | C3  | C4  | 38.9(6)     |
| C6  | C2  | C3  | C5  | 110.7(4)    | C3  | C2  | C7  | C9  | -164.3(7)   |
| C7  | C2  | C3  | C4  | 156.9(4)    | C7  | C2  | C3  | C5  | -131.3(3)   |

|     |     |     |     |             |     |     |     |     |             |
|-----|-----|-----|-----|-------------|-----|-----|-----|-----|-------------|
| C3  | C2  | C8  | C6  | 156.4(6)    | C8  | C2  | C3  | C4  | 27.6(5)     |
| C8  | C2  | C3  | C5  | 99.4(3)     | C3  | C2  | C9  | C7  | 16.7(8)     |
| C9  | C2  | C3  | C4  | 151.3(4)    | C9  | C2  | C3  | C5  | -136.9(3)   |
| C4  | C2  | C6  | C8  | -12.2(7)    | C6  | C2  | C4  | C3  | -150.8(3)   |
| C6  | C2  | C4  | C5  | 137.4(3)    | C4  | C2  | C7  | C9  | -152.8(6)   |
| C7  | C2  | C4  | C3  | -25.6(4)    | C7  | C2  | C4  | C5  | -97.5(3)    |
| C4  | C2  | C8  | C6  | 168.6(7)    | C8  | C2  | C4  | C3  | -155.1(4)   |
| C8  | C2  | C4  | C5  | 133.1(3)    | C4  | C2  | C9  | C7  | 33.9(9)     |
| C9  | C2  | C4  | C3  | -37.7(5)    | C9  | C2  | C4  | C5  | -109.6(4)   |
| C6  | C2  | C7  | C9  | -27.5(8)    | C7  | C2  | C6  | C8  | -140.1(6)   |
| C6  | C2  | C8  | C6  | 0.0(6)      | C8  | C2  | C6  | C8  | 0.0(7)      |
| C6  | C2  | C9  | C7  | 154.2(7)    | C9  | C2  | C6  | C8  | -149.2(6)   |
| C7  | C2  | C8  | C6  | 47.5(8)     | C8  | C2  | C7  | C9  | -43.8(9)    |
| C8  | C2  | C9  | C7  | 143.0(7)    | C9  | C2  | C8  | C6  | 33.0(8)     |
| C2  | C3  | C4  | C2  | 0.00(5)     | C2  | C3  | C4  | C5  | 109.4(2)    |
| C2  | C3  | C5  | C1  | 20.7(3)     | C2  | C3  | C5  | C4  | -70.8(4)    |
| C2  | C3  | C5  | C10 | -106.6(2)   | C2  | C3  | C5  | C11 | 132.9(2)    |
| C4  | C3  | C5  | C1  | 91.5(4)     | C4  | C3  | C5  | C4  | -0.0(3)     |
| C4  | C3  | C5  | C10 | -35.8(5)    | C4  | C3  | C5  | C11 | -156.3(4)   |
| C5  | C3  | C4  | C2  | -109.4(2)   | C5  | C3  | C4  | C5  | 0.00(6)     |
| C2  | C4  | C5  | C1  | -23.1(2)    | C2  | C4  | C5  | C3  | 72.5(2)     |
| C2  | C4  | C5  | C10 | -137.36(18) | C2  | C4  | C5  | C11 | 100.8(2)    |
| C3  | C4  | C5  | C1  | -95.6(4)    | C3  | C4  | C5  | C3  | -0.0(4)     |
| C3  | C4  | C5  | C10 | 150.2(4)    | C3  | C4  | C5  | C11 | 28.3(5)     |
| C2  | C6  | C8  | C2  | 0.00(6)     | C2  | C7  | C9  | C2  | -0.00(5)    |
| N1  | C12 | C13 | C14 | -173.81(10) | N1  | C12 | C13 | C18 | 10.62(18)   |
| N1  | C12 | C17 | C16 | 173.34(10)  | N1  | C12 | C17 | C21 | -11.26(18)  |
| C13 | C12 | C17 | C16 | -4.72(18)   | C13 | C12 | C17 | C21 | 170.68(11)  |
| C17 | C12 | C13 | C14 | 4.25(18)    | C17 | C12 | C13 | C18 | -171.32(11) |
| C12 | C13 | C14 | C15 | -0.6(2)     | C12 | C13 | C18 | C19 | 106.24(14)  |
| C12 | C13 | C18 | C20 | -131.41(12) | C14 | C13 | C18 | C19 | -69.27(15)  |
| C14 | C13 | C18 | C20 | 53.08(17)   | C18 | C13 | C14 | C15 | 175.24(11)  |
| C13 | C14 | C15 | C16 | -2.5(2)     | C14 | C15 | C16 | C17 | 2.0(2)      |
| C15 | C16 | C17 | C12 | 1.5(2)      | C15 | C16 | C17 | C21 | -174.06(12) |
| C12 | C17 | C21 | C22 | 134.58(12)  | C12 | C17 | C21 | C23 | -102.55(14) |
| C16 | C17 | C21 | C22 | -50.11(16)  | C16 | C17 | C21 | C23 | 72.76(14)   |

## Reference

- (1) Arata, S.; Sunada, Y. *Dalton Trans.* 2019, **48**, 2891-2895.
- (2) Fischer, R.; Konopa, T.; Ullly, S.; Baumgartner, J.; Marschner, C. *J. Organomet. Chem.* 2003, **685**, 79-92.
- (3) Ansell, M. B.; Roberts, D. E.; Cloke, F. G. N.; Navarro, O.; Spencer, J. *Angew. Chem. Int. Ed.* 2015, **54**, 5578-5582.
- (4) Xiao, Y.; Liu, Z.; Liang, J.; Yang, K.; Huang, W. *Dalton Trans.* 2022, **51**, 15873-15882.
- (5) SIR2008: Burla, M. C.; Caliandro, R.; Camalli, M.; Carrozzini, B.; Cascarano, G. L.; De Caro, L.; Giacovazzo, C.; Polidori, G.; Siliqi, D.; Spagna, R. *J. Appl. Cryst.*, 2007, **40**, 609-613.
- (6) International Tables for Crystallography, Vol. C; (Ed. Wilson, A. J. C.) Kluwer Academic Publishers, Dordrecht, Netherlands, Table 6.1.1.4, 1992, pp. 572.
- (7) Ibers, J. A.; Hamilton, W. C. *Acta Cryst.*, 1964, **17**, 781-782.
- (8) Creagh, D. C.; McAuley, W. J. in *International Tables for Crystallography, Vol C*; (Ed. Wilson, A. J. C.), Kluwer Academic Publishers, Dordrecht, Netherlands, Table 4.2.6.8, 1992, pages 219-222.
- (9) Creagh, D. C.; Hubbell, J. H. in *International Tables for Crystallography, Vol C*; (Ed. Wilson, A. J. C.), Kluwer Academic Publishers, Boston, Table 4.2.4.3, 1992, pages 200-206.
- (10) CrystalStructure 4.2.5: Crystal Structure Analysis Package, Rigaku Corporation (2000-2017). Tokyo 196-8666, Japan.
- (11) SHELXL Version 2017/1: Sheldrick, G. M. *Acta Cryst.*, 2008, **A64**, 112-122.
